# Supplementary material
Source: ML conference proceedings conference paper supplement (https://openaccess.thecvf.com/content/ACCV2020/html/Tattersall_Reconstructing_Creative_Lego_ACCV_2020_paper.html)

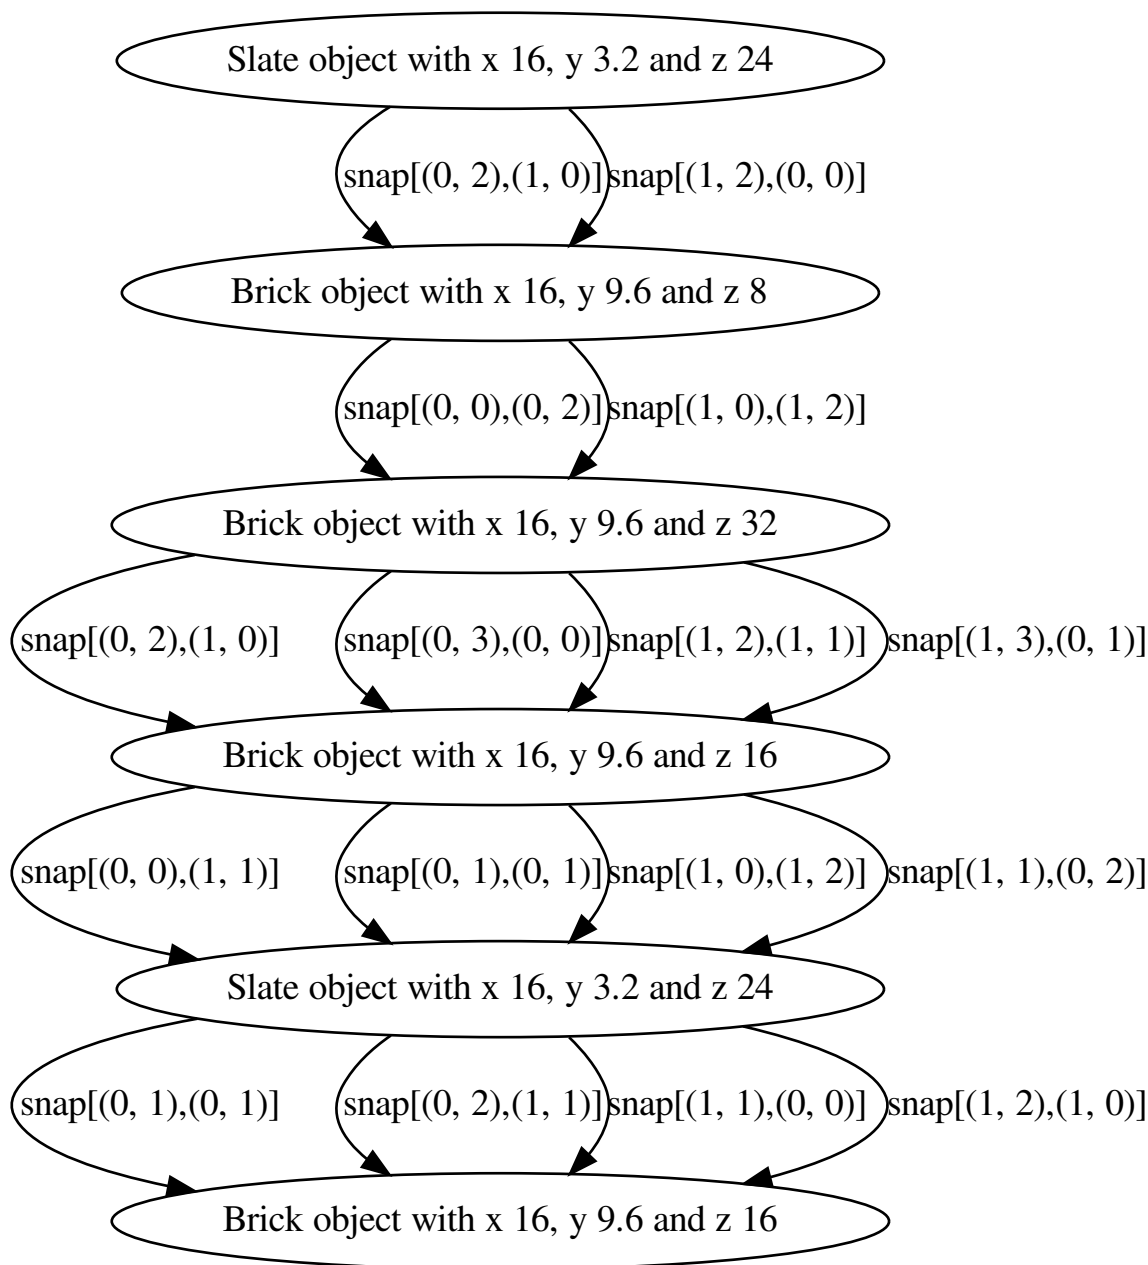

Supplement: Supplementary file 1 [file Tattersall_Reconstructing_Creative_Lego_ACCV_2020_supplemental.zip]

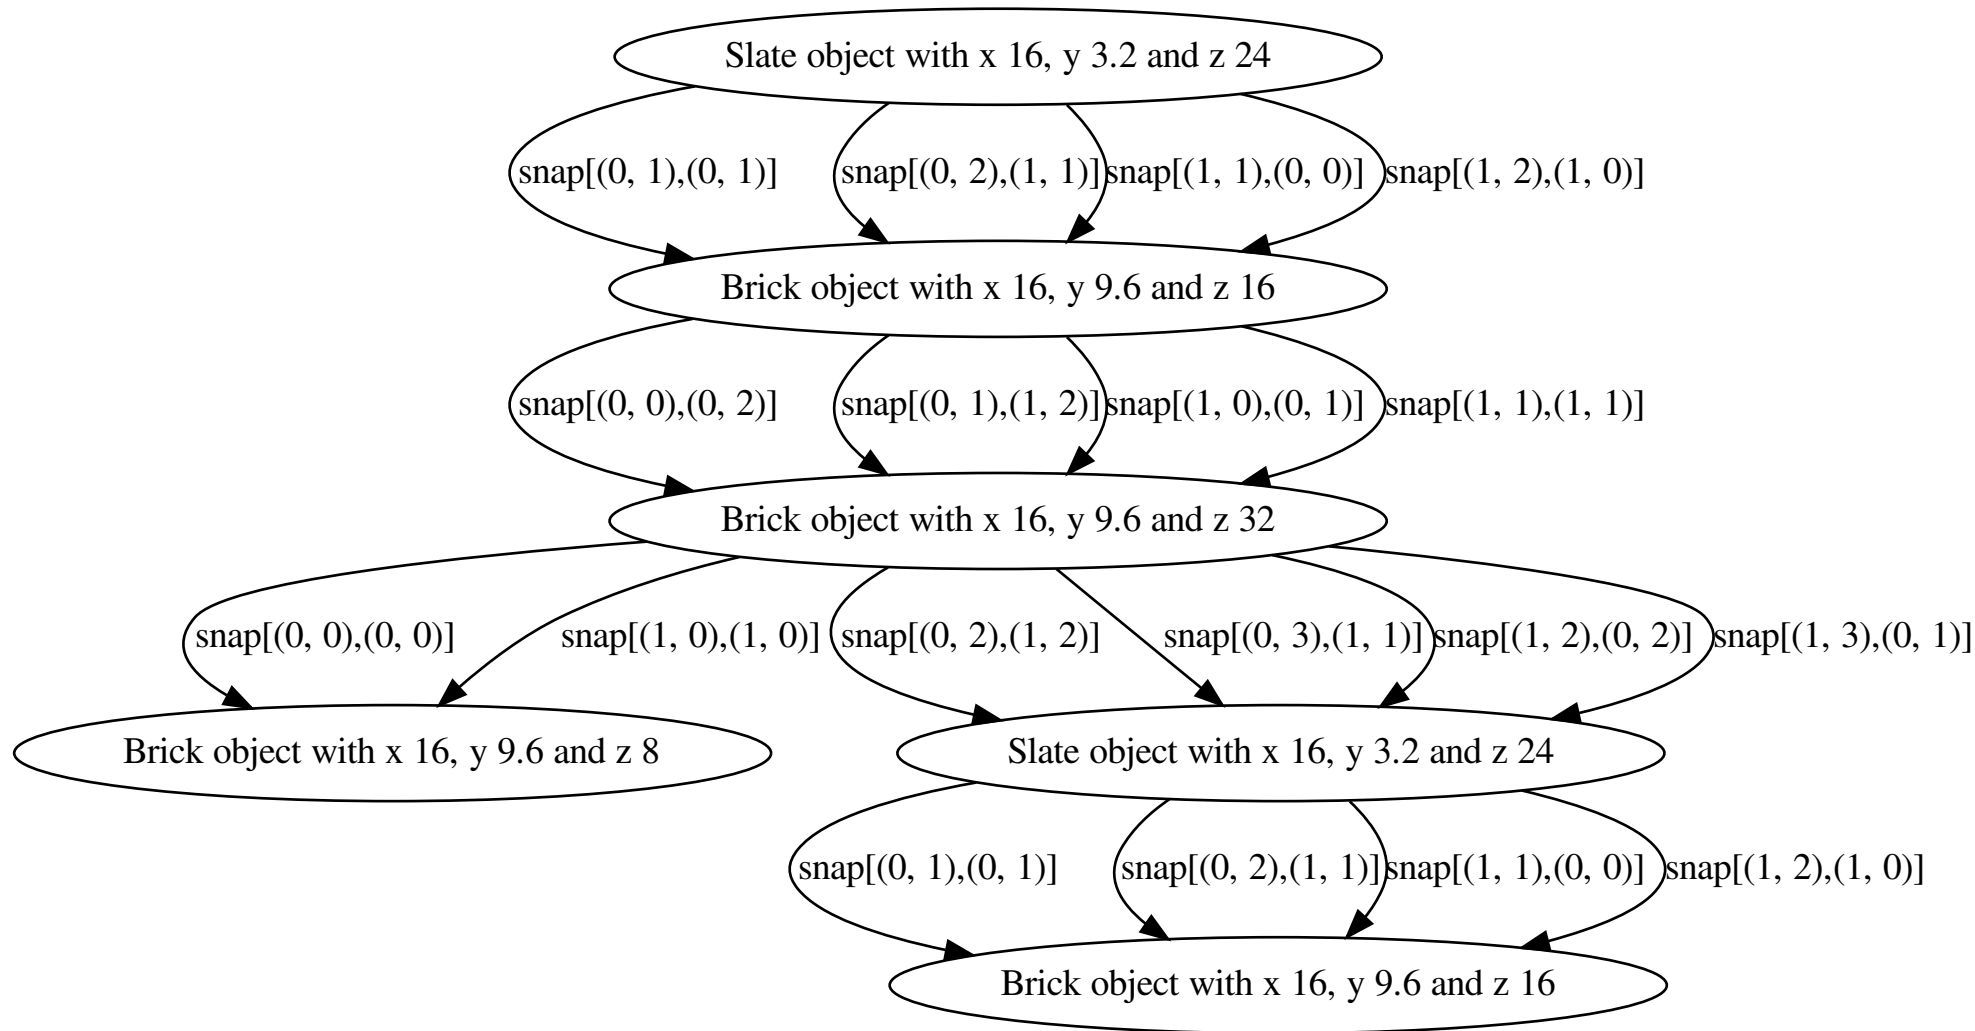

Supplement: Supplementary file 2 [file Tattersall_Reconstructing_Creative_Lego_ACCV_2020_supplemental.zip]

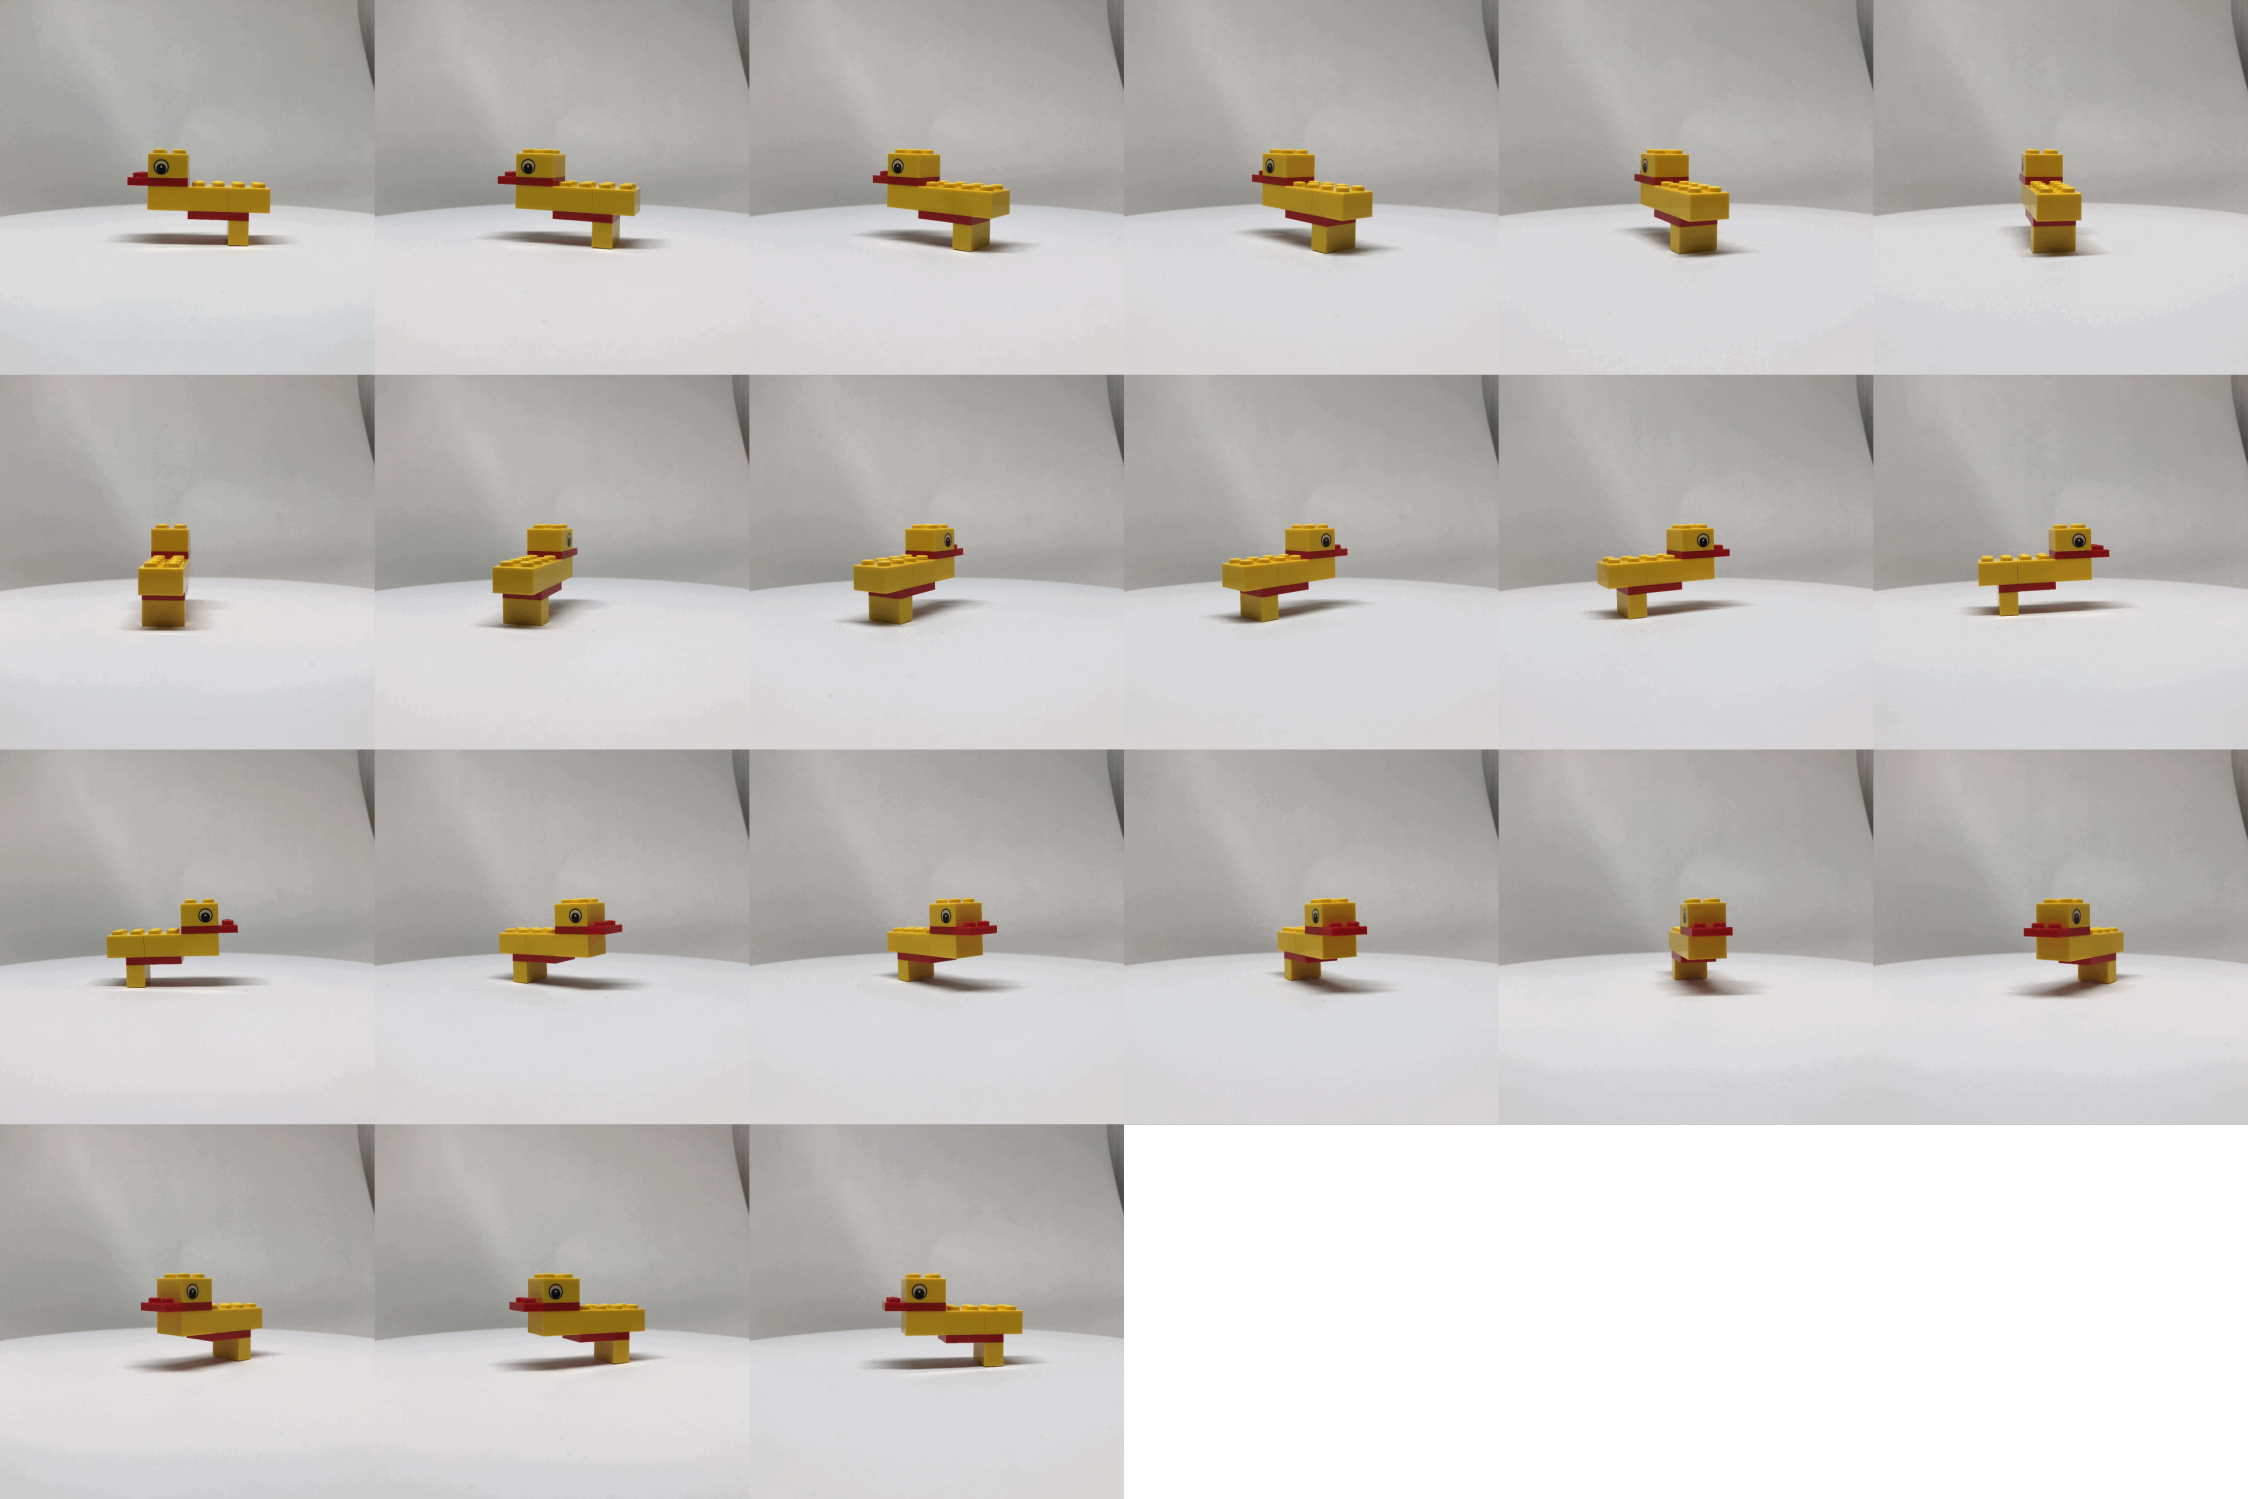

Supplement: Supplementary file 3 [file Tattersall_Reconstructing_Creative_Lego_ACCV_2020_supplemental.zip]

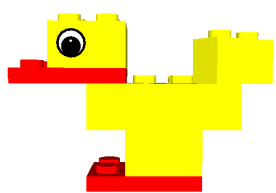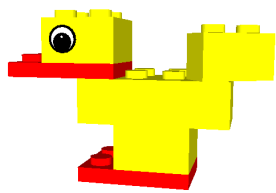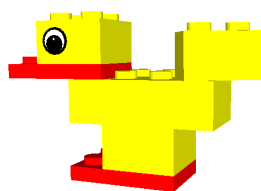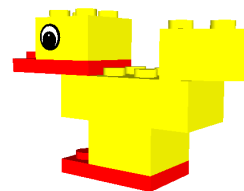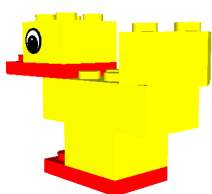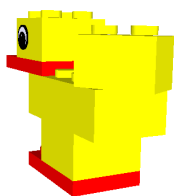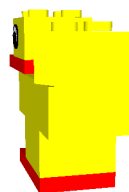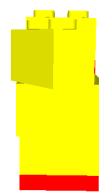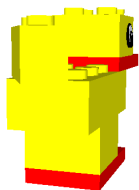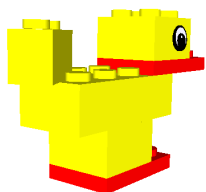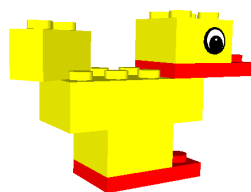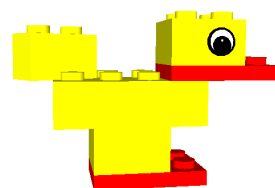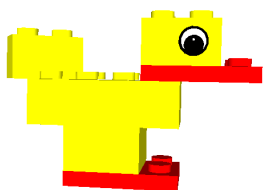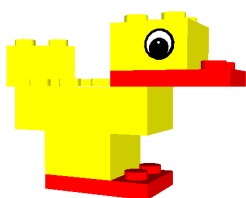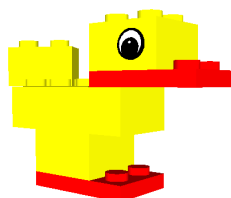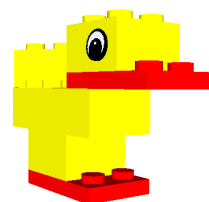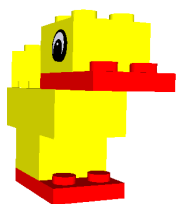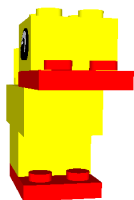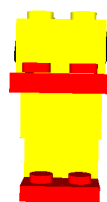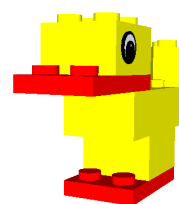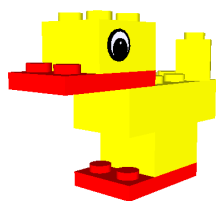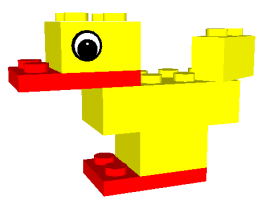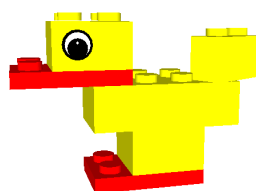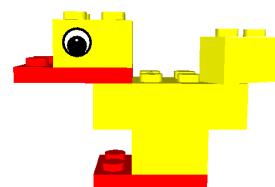

Supplement: Supplementary file 4 [file Tattersall_Reconstructing_Creative_Lego_ACCV_2020_supplemental.zip]

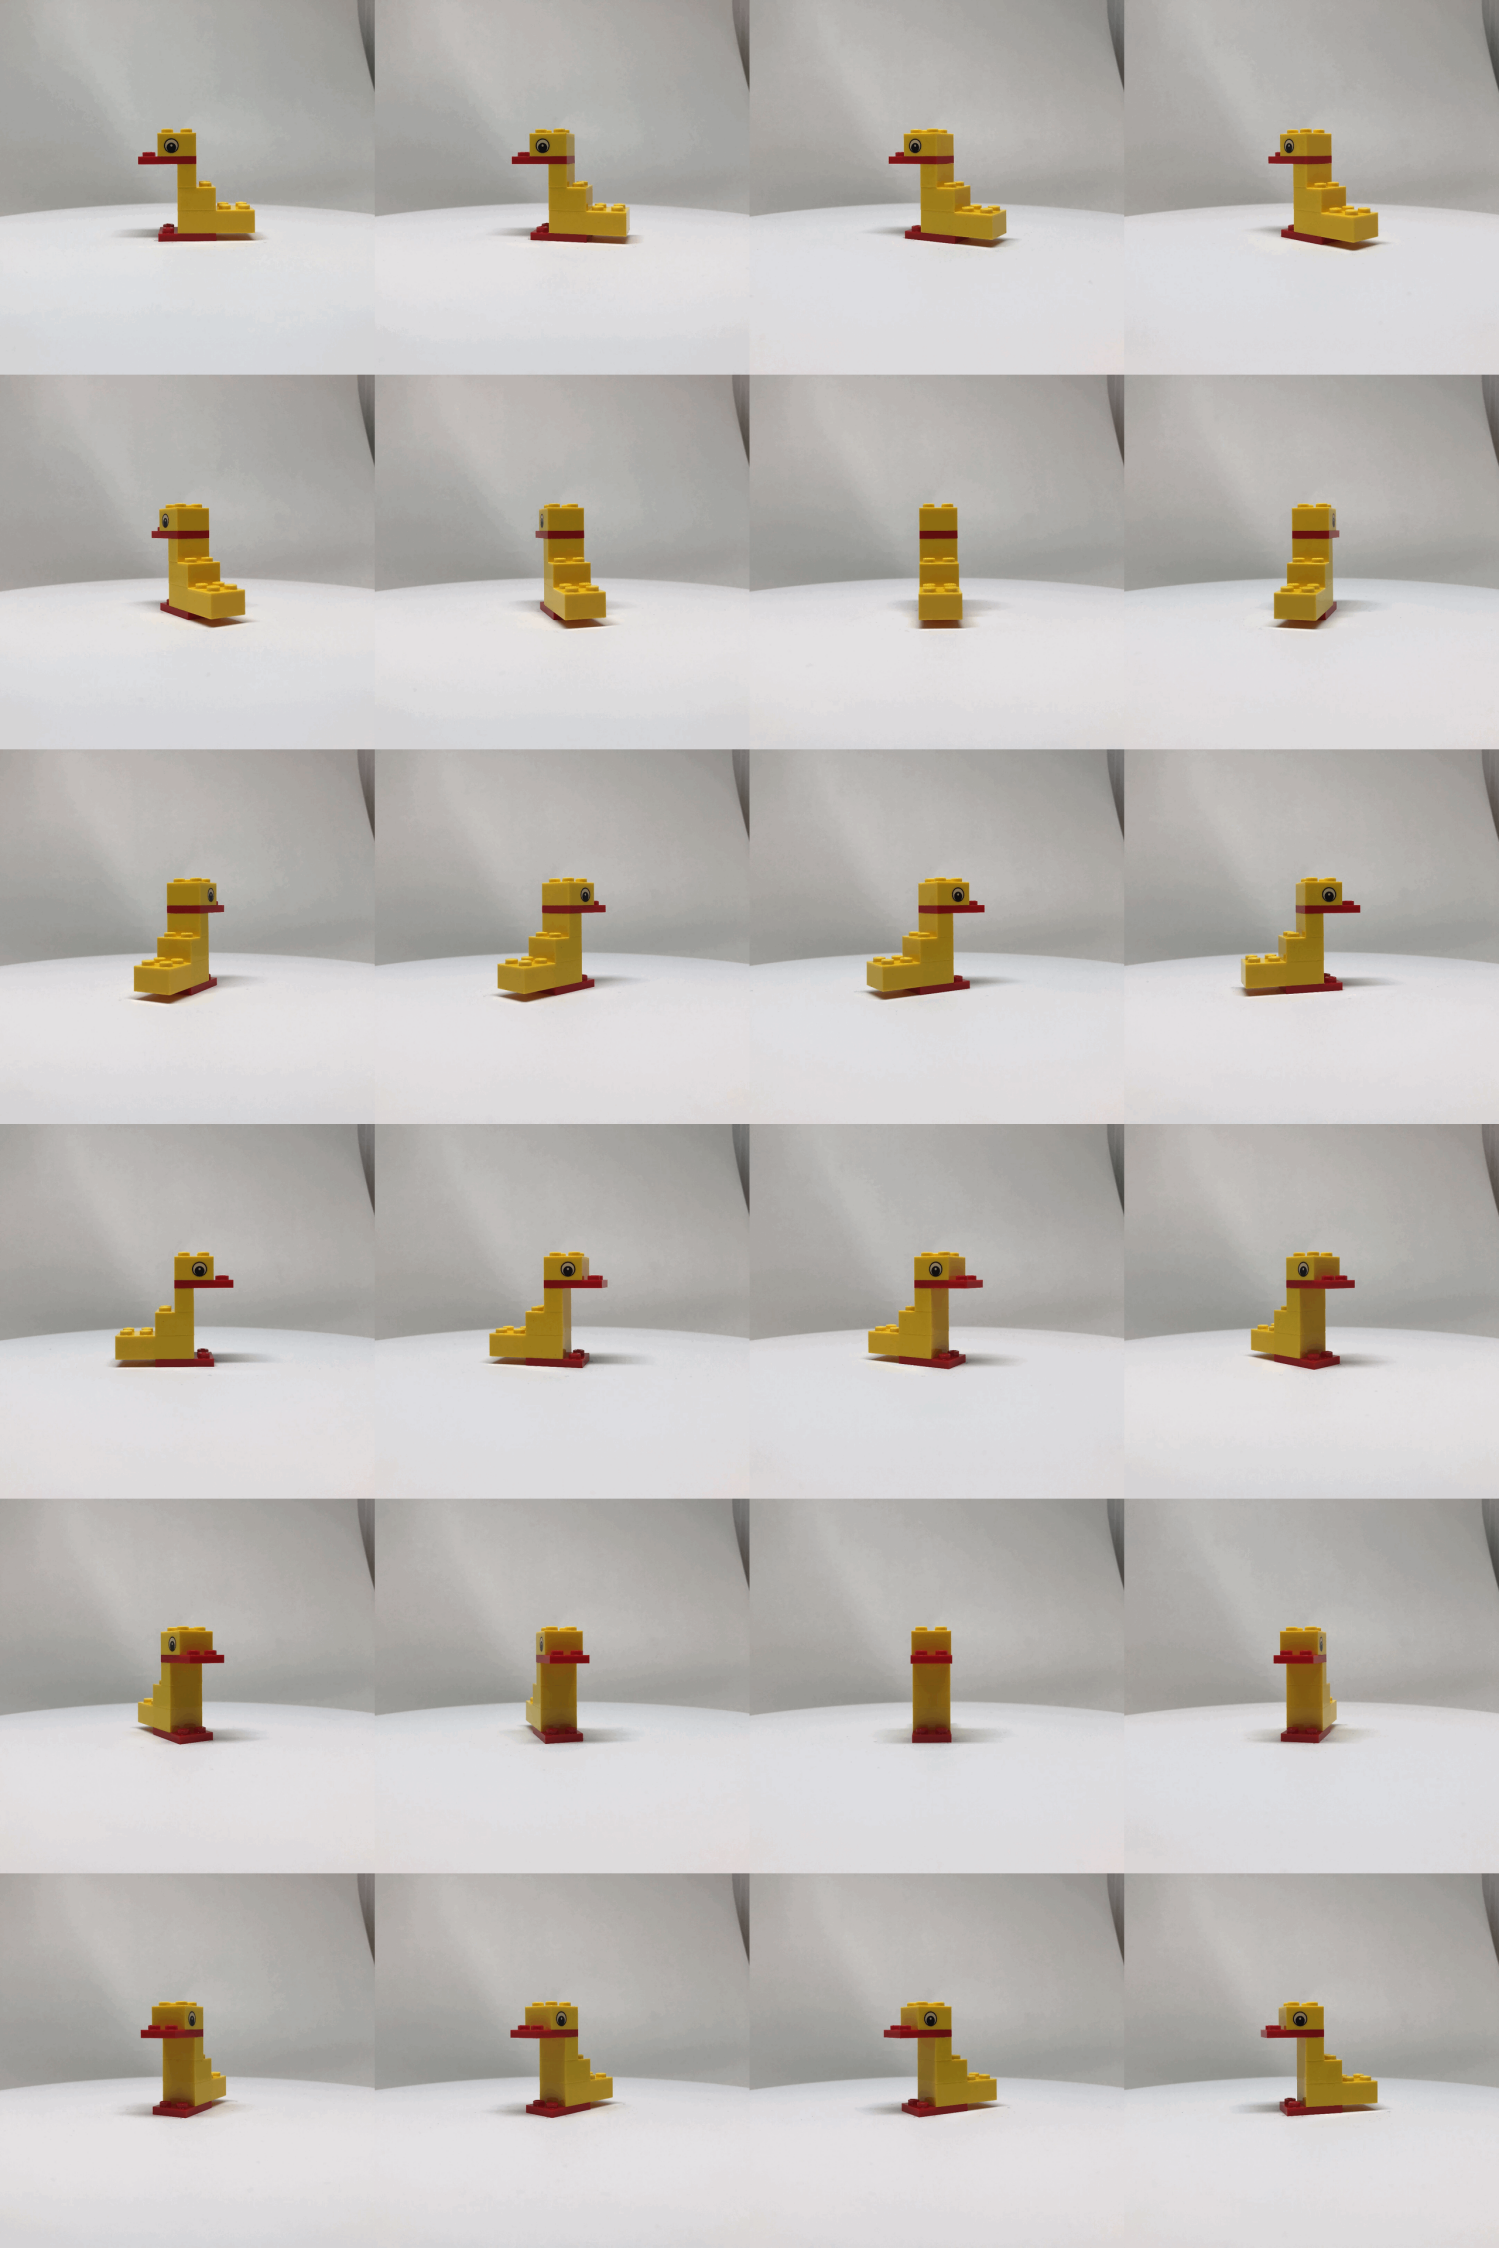

Supplement: Supplementary file 5 [file Tattersall_Reconstructing_Creative_Lego_ACCV_2020_supplemental.zip]

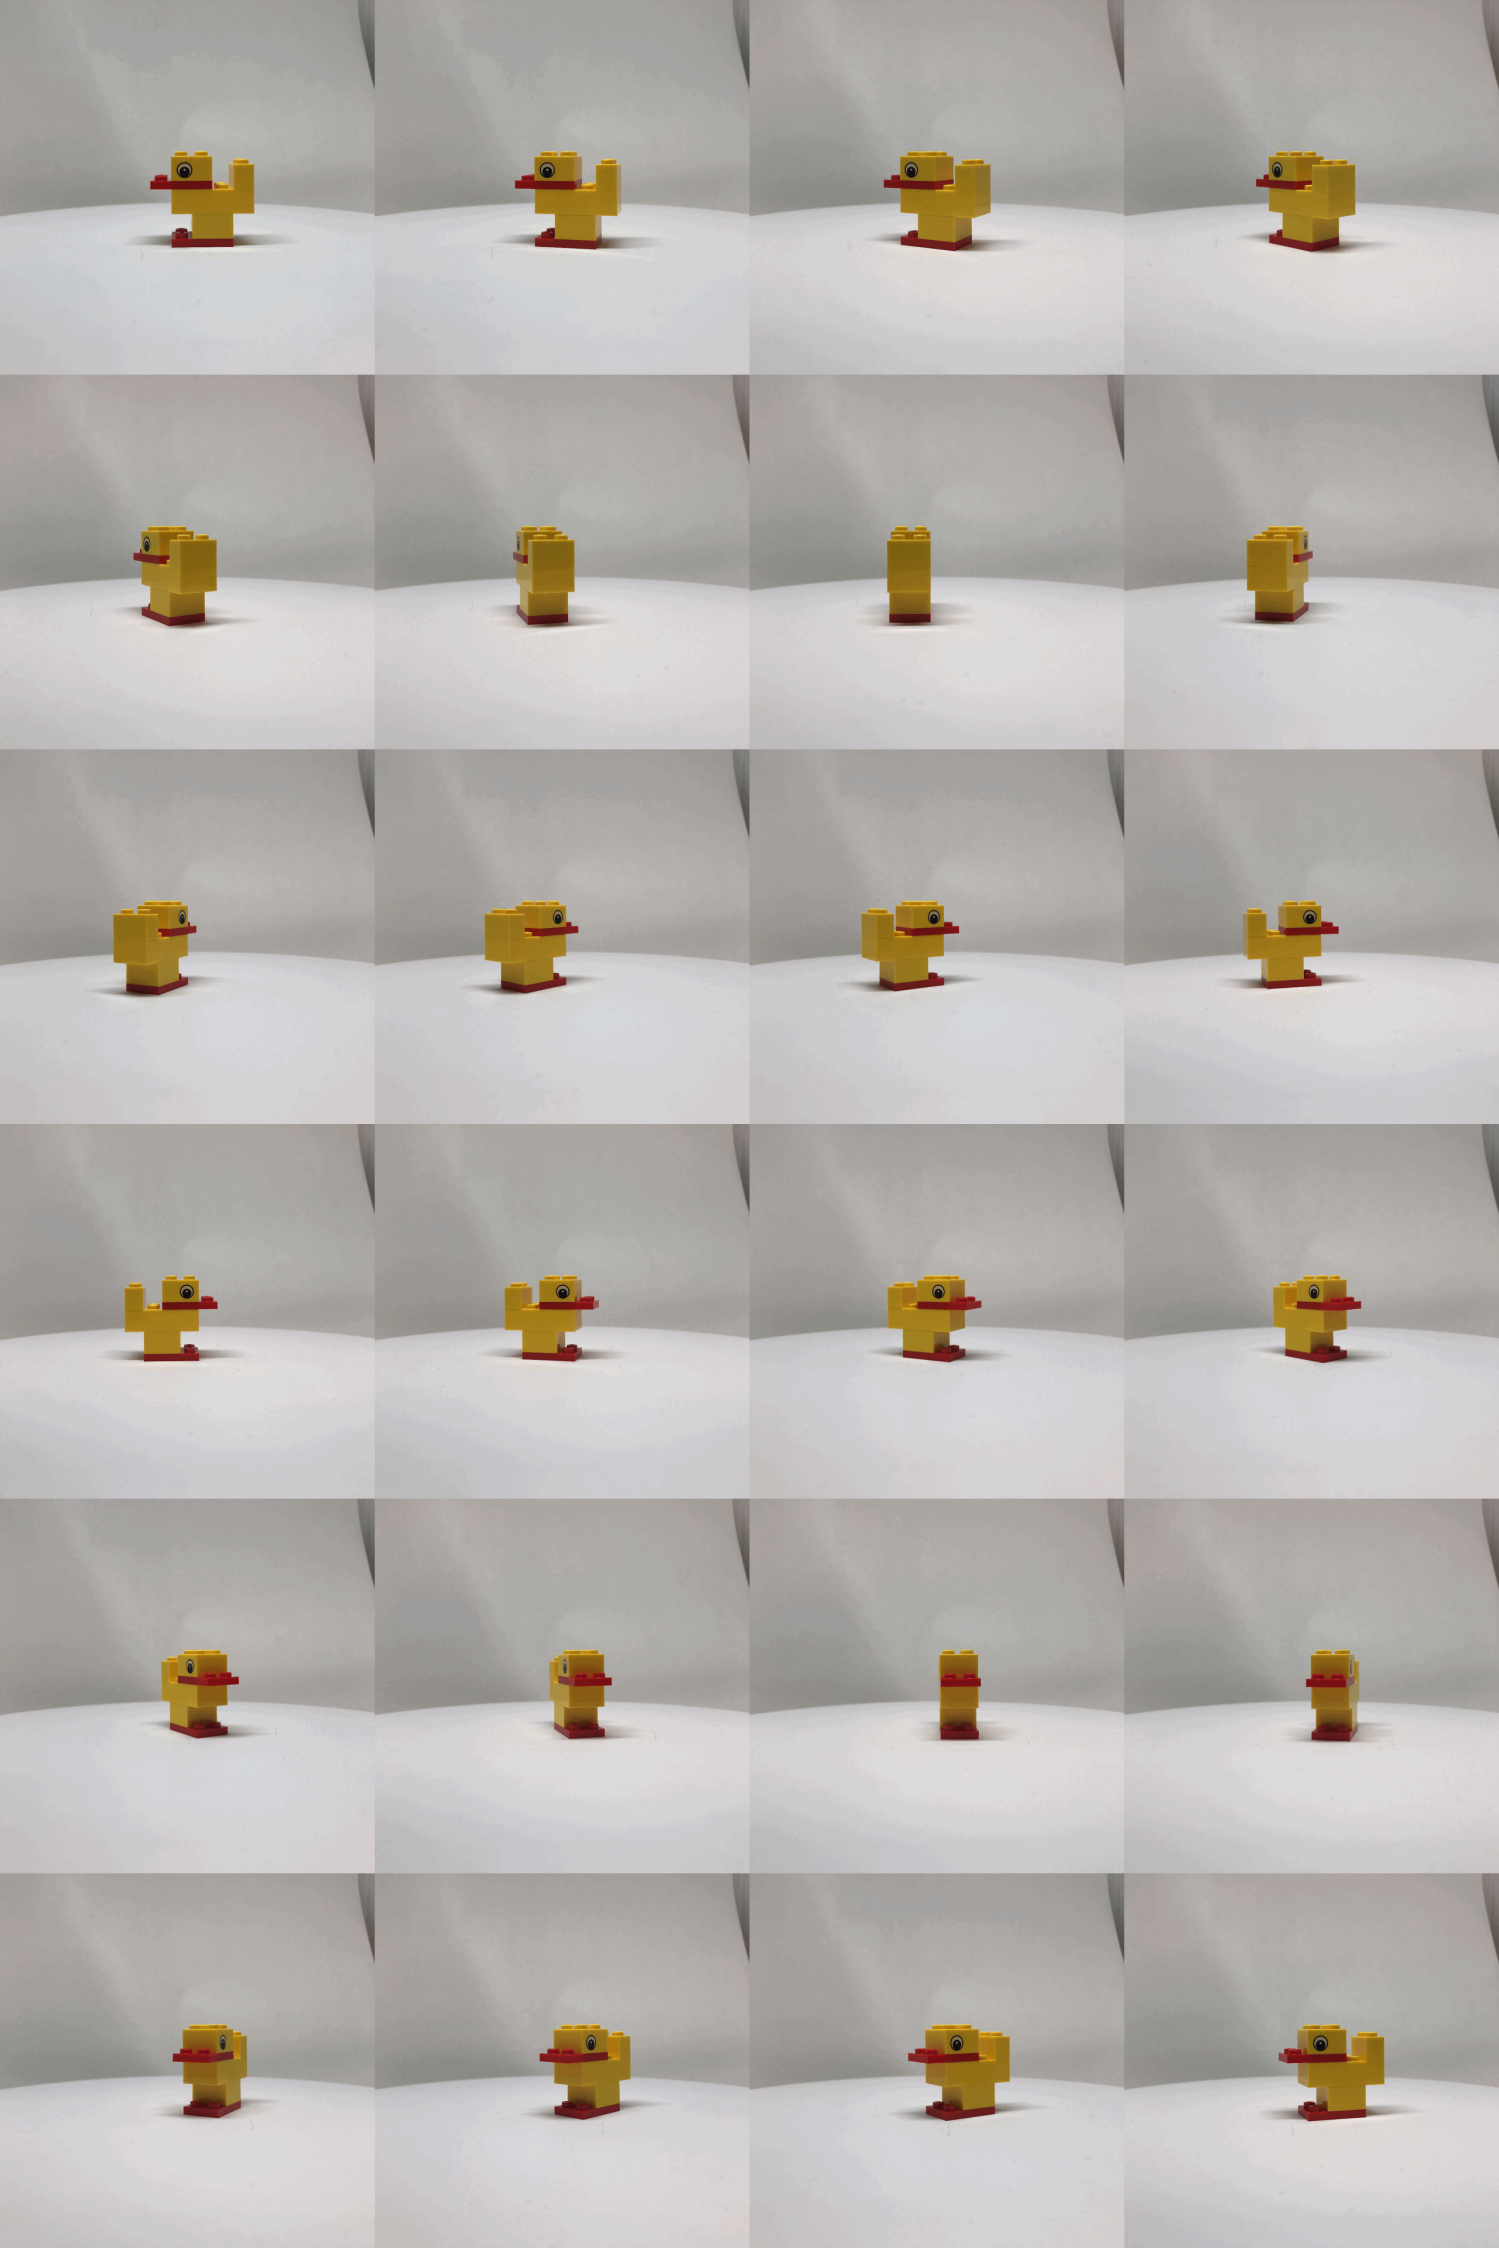

Supplement: Supplementary file 6 [file Tattersall_Reconstructing_Creative_Lego_ACCV_2020_supplemental.zip]

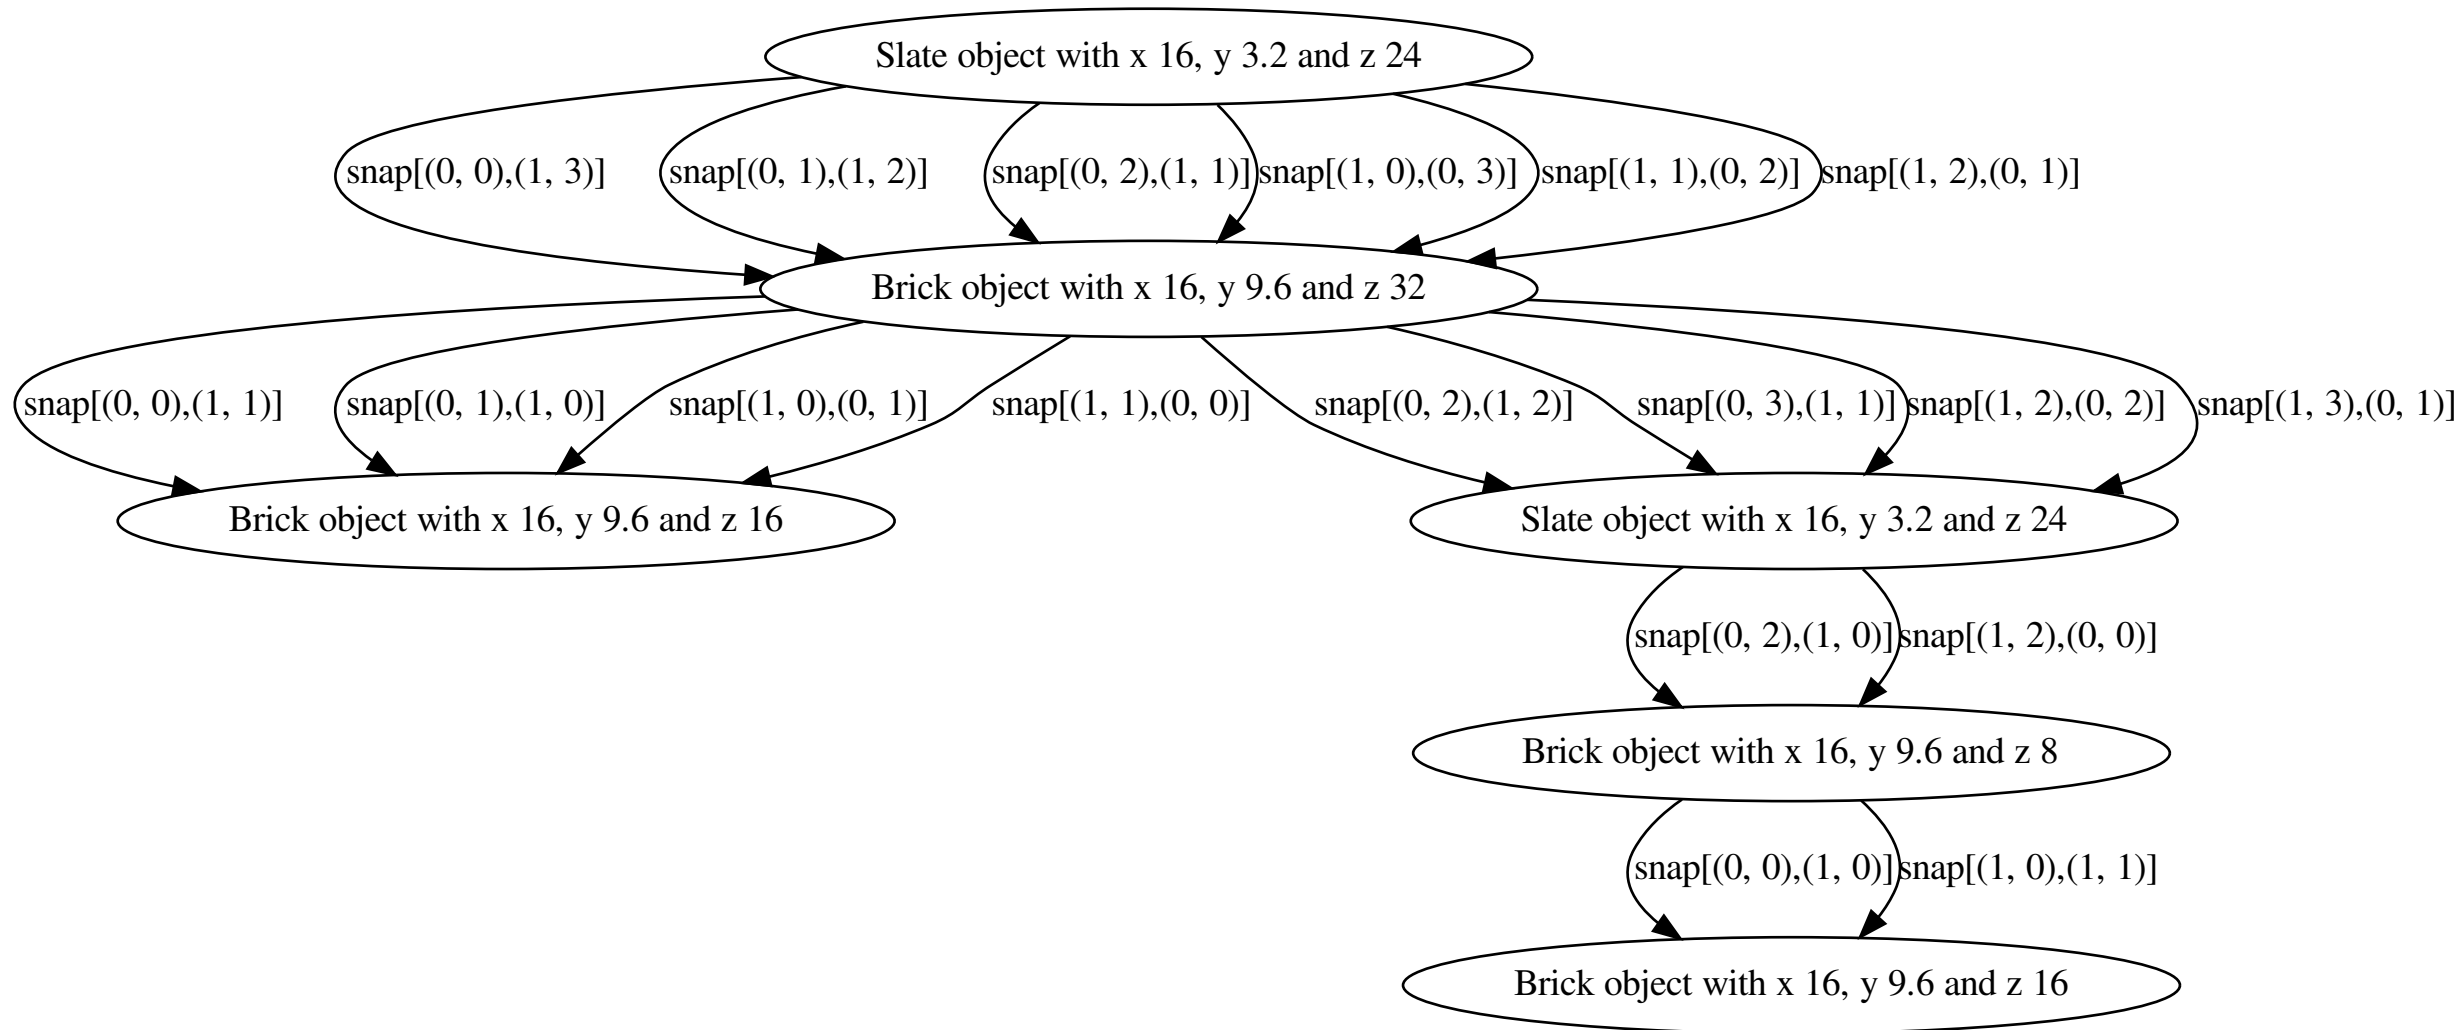

Supplement: Supplementary file 7 [file Tattersall_Reconstructing_Creative_Lego_ACCV_2020_supplemental.zip]

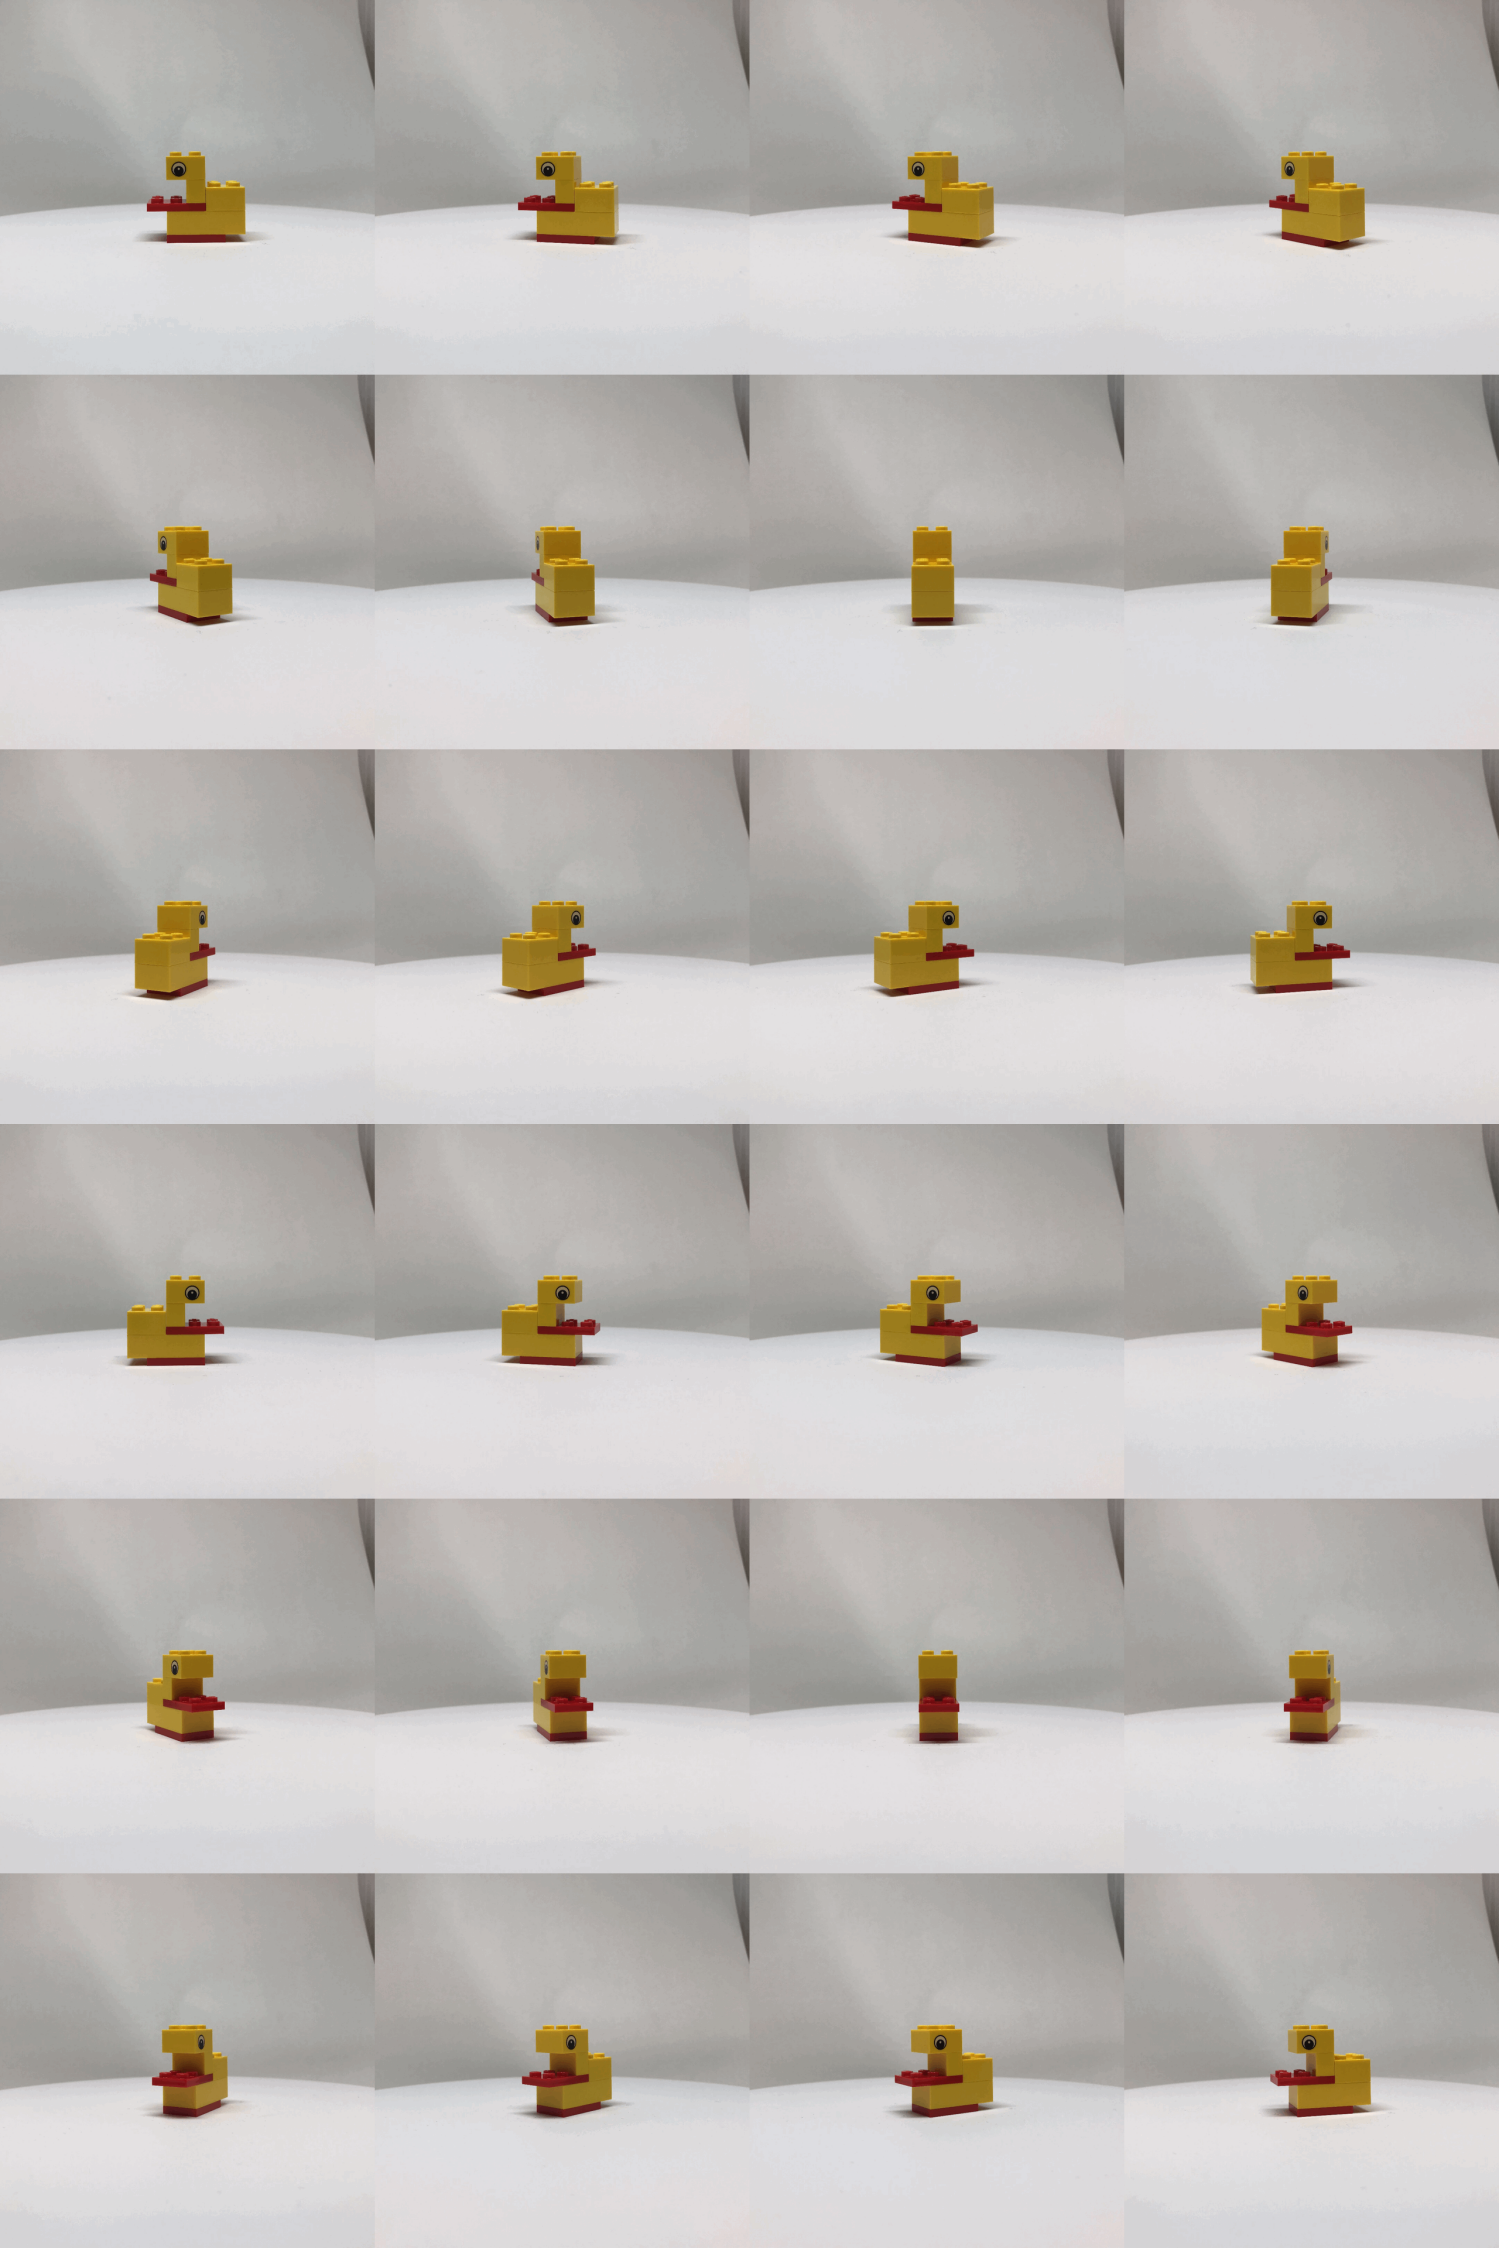

Supplement: Supplementary file 8 [file Tattersall_Reconstructing_Creative_Lego_ACCV_2020_supplemental.zip]

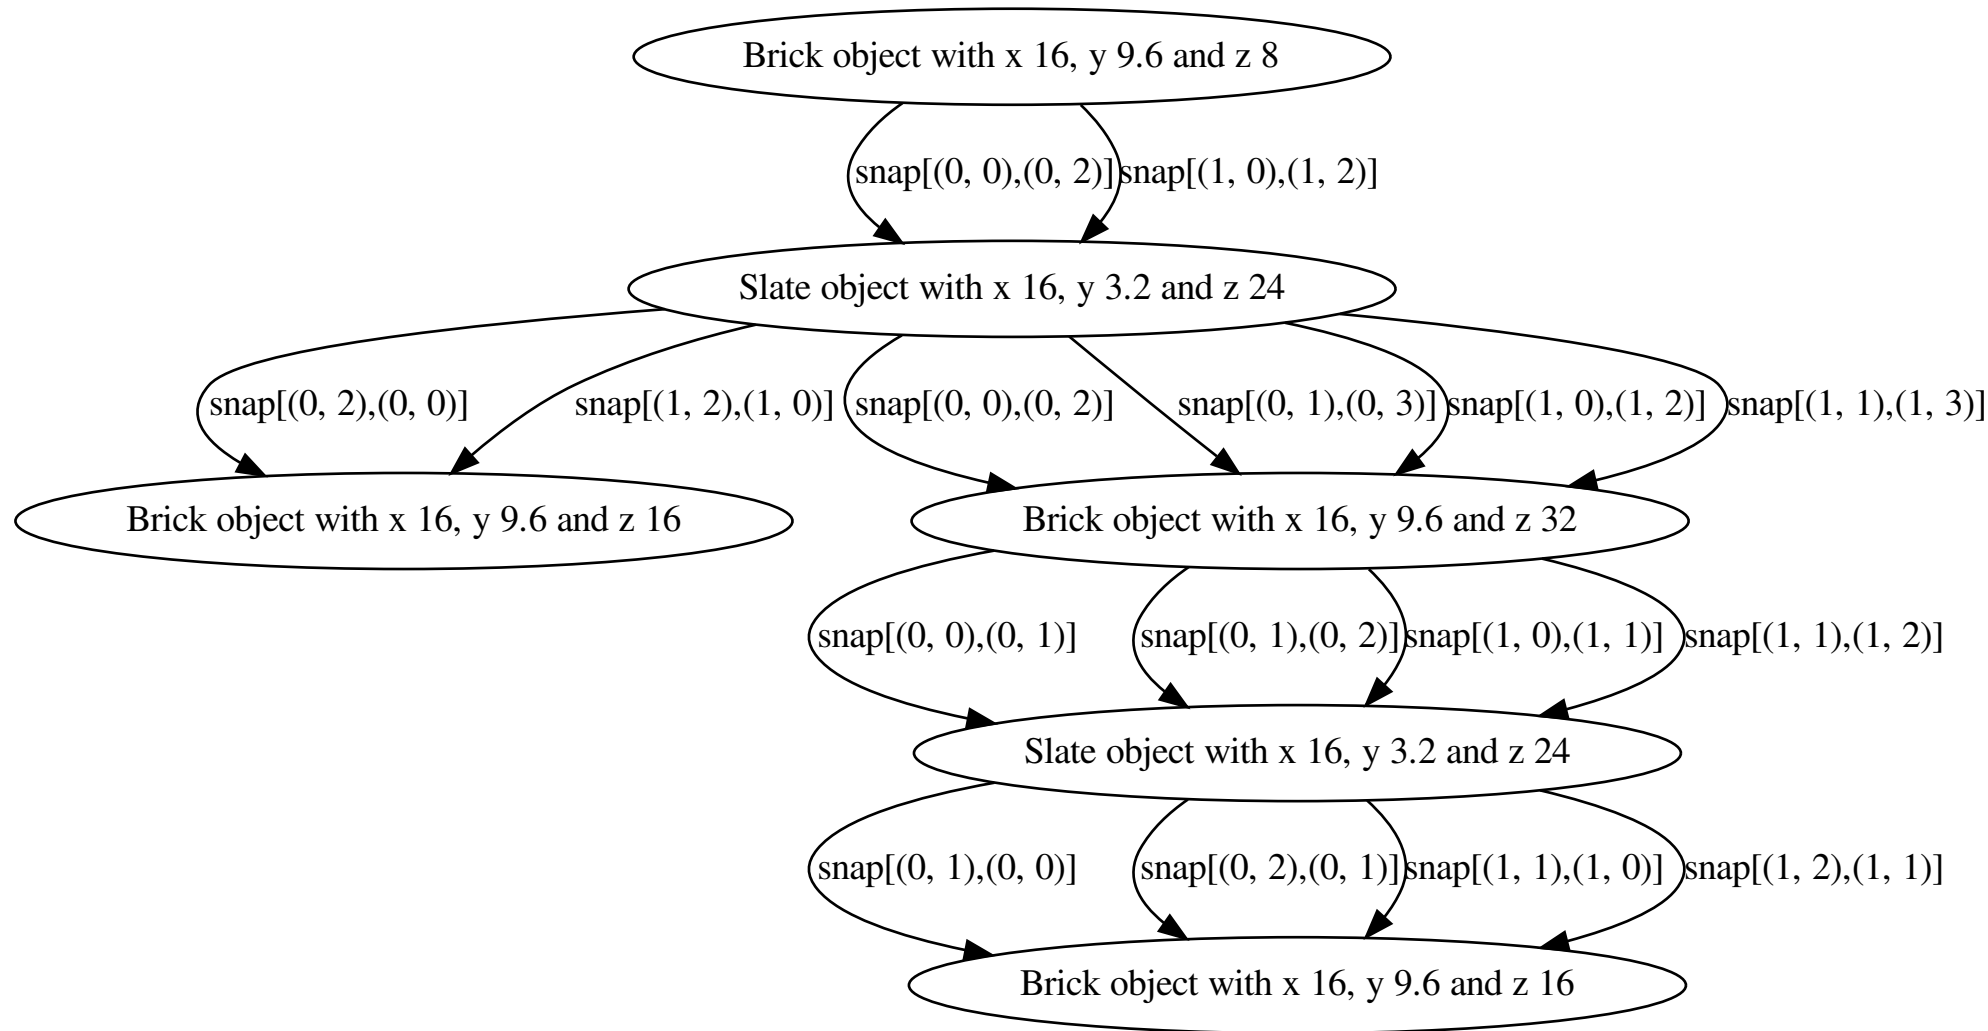

Supplement: Supplementary file 9 [file Tattersall_Reconstructing_Creative_Lego_ACCV_2020_supplemental.zip]

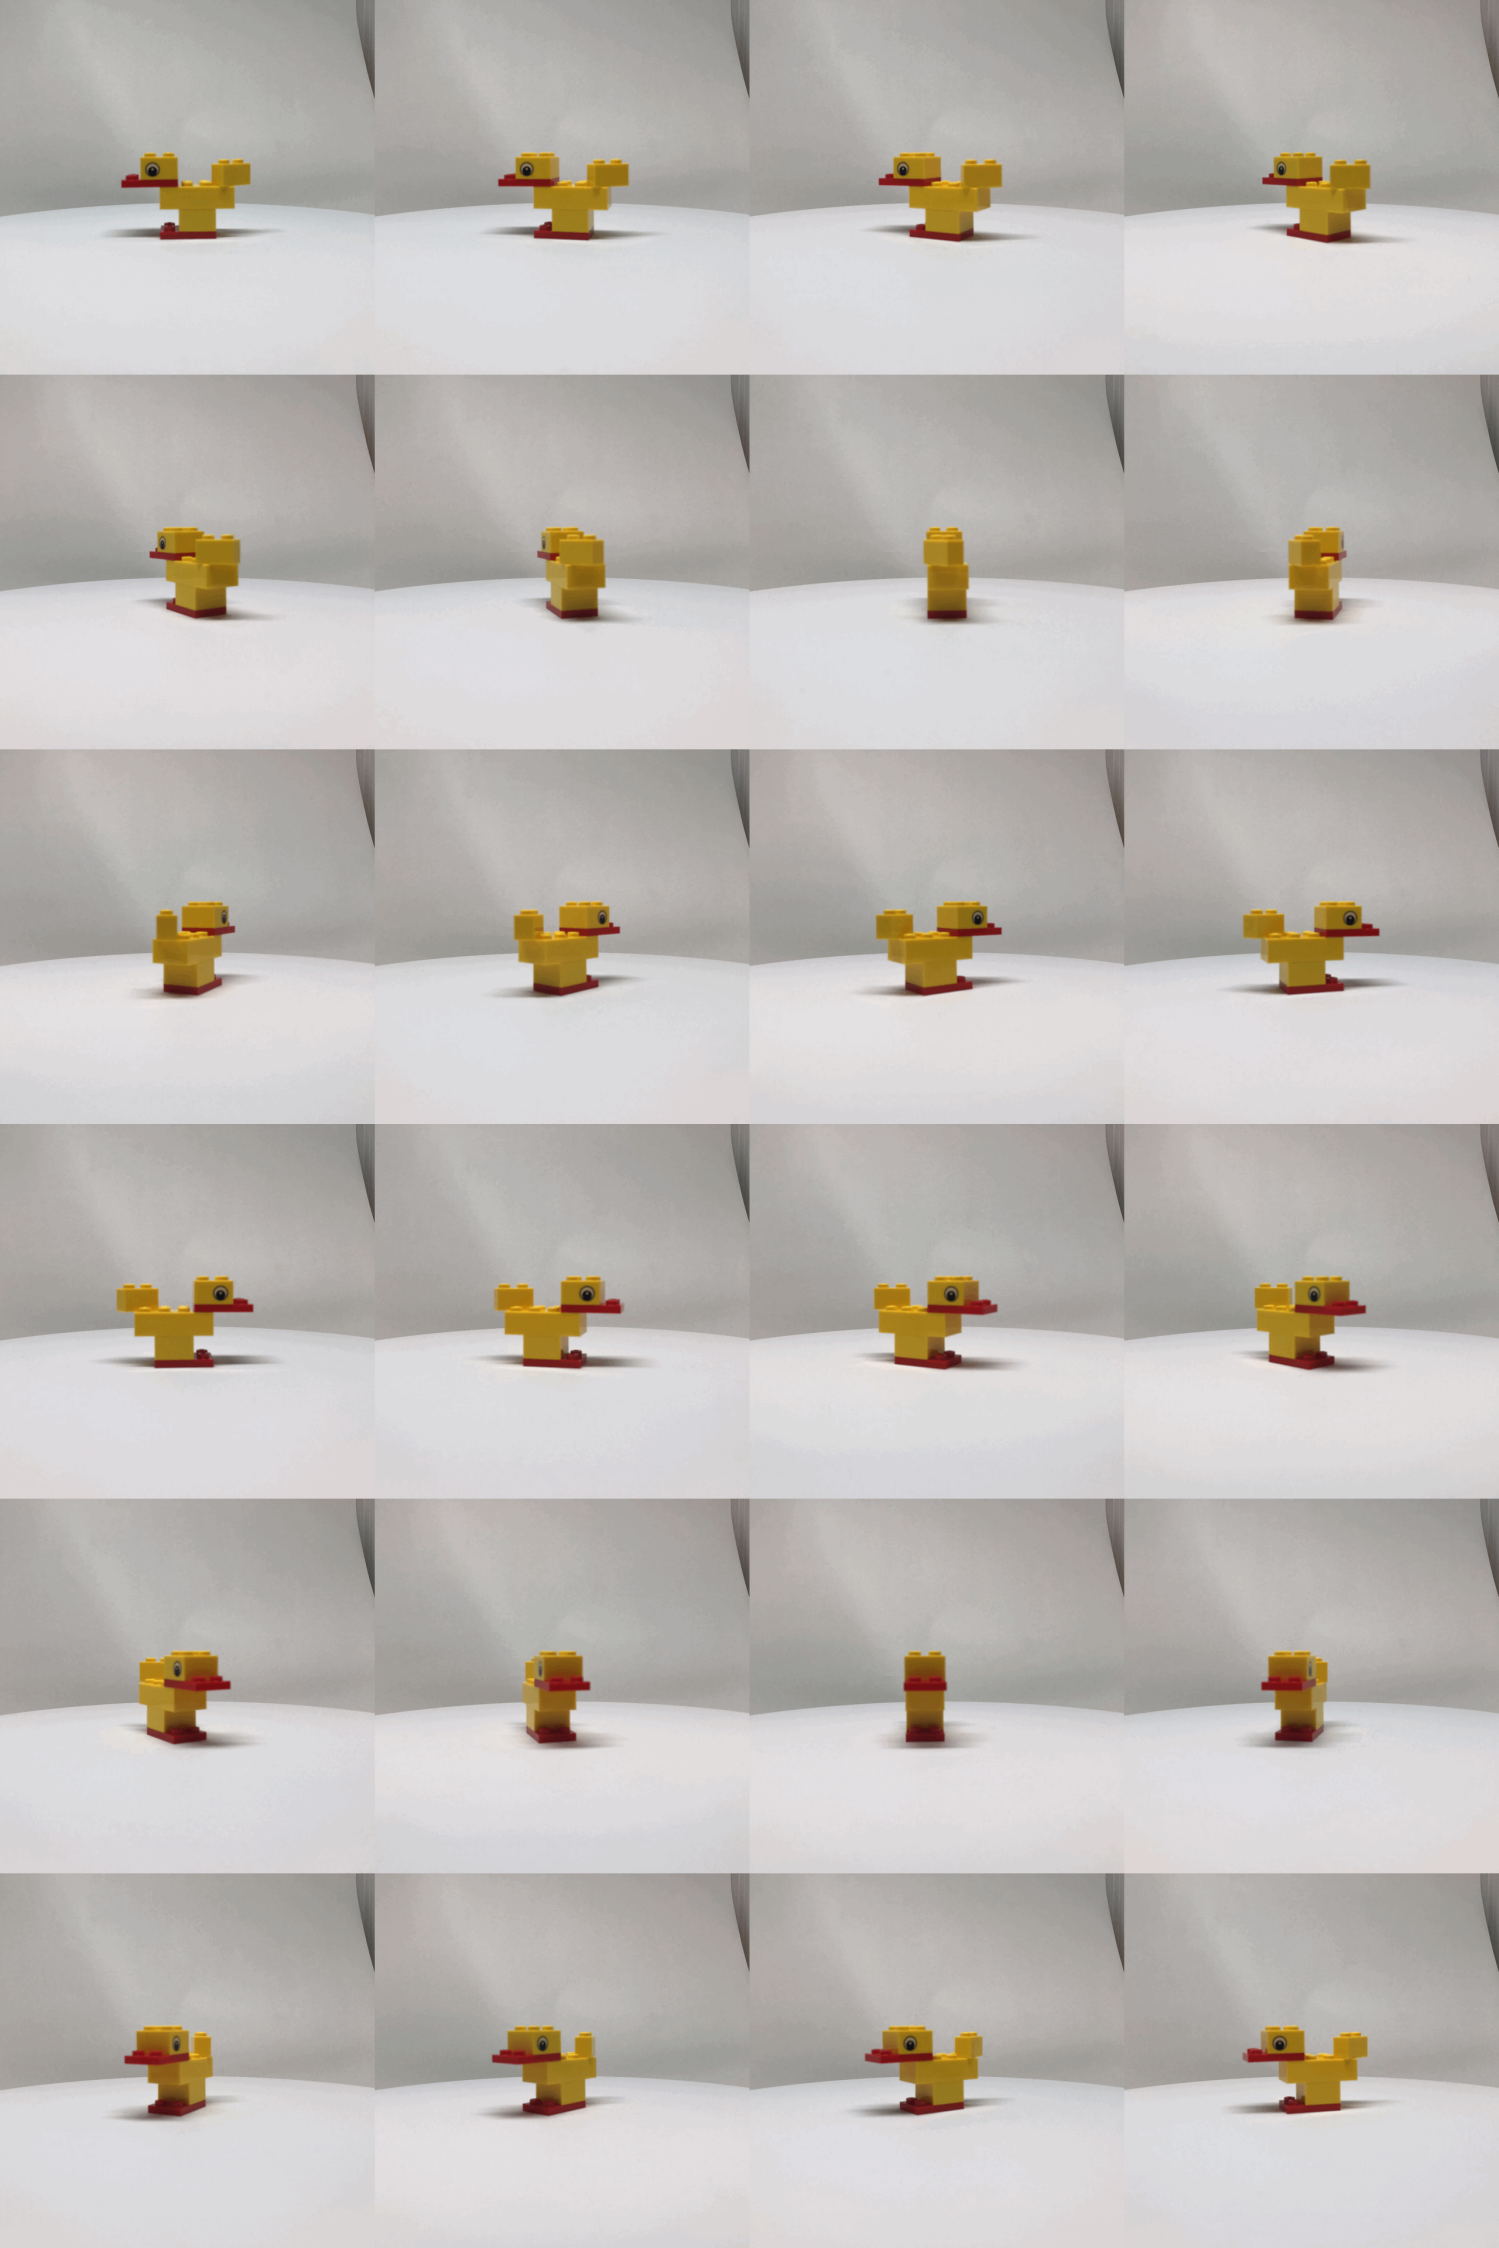

Supplement: Supplementary file 10 [file Tattersall_Reconstructing_Creative_Lego_ACCV_2020_supplemental.zip]

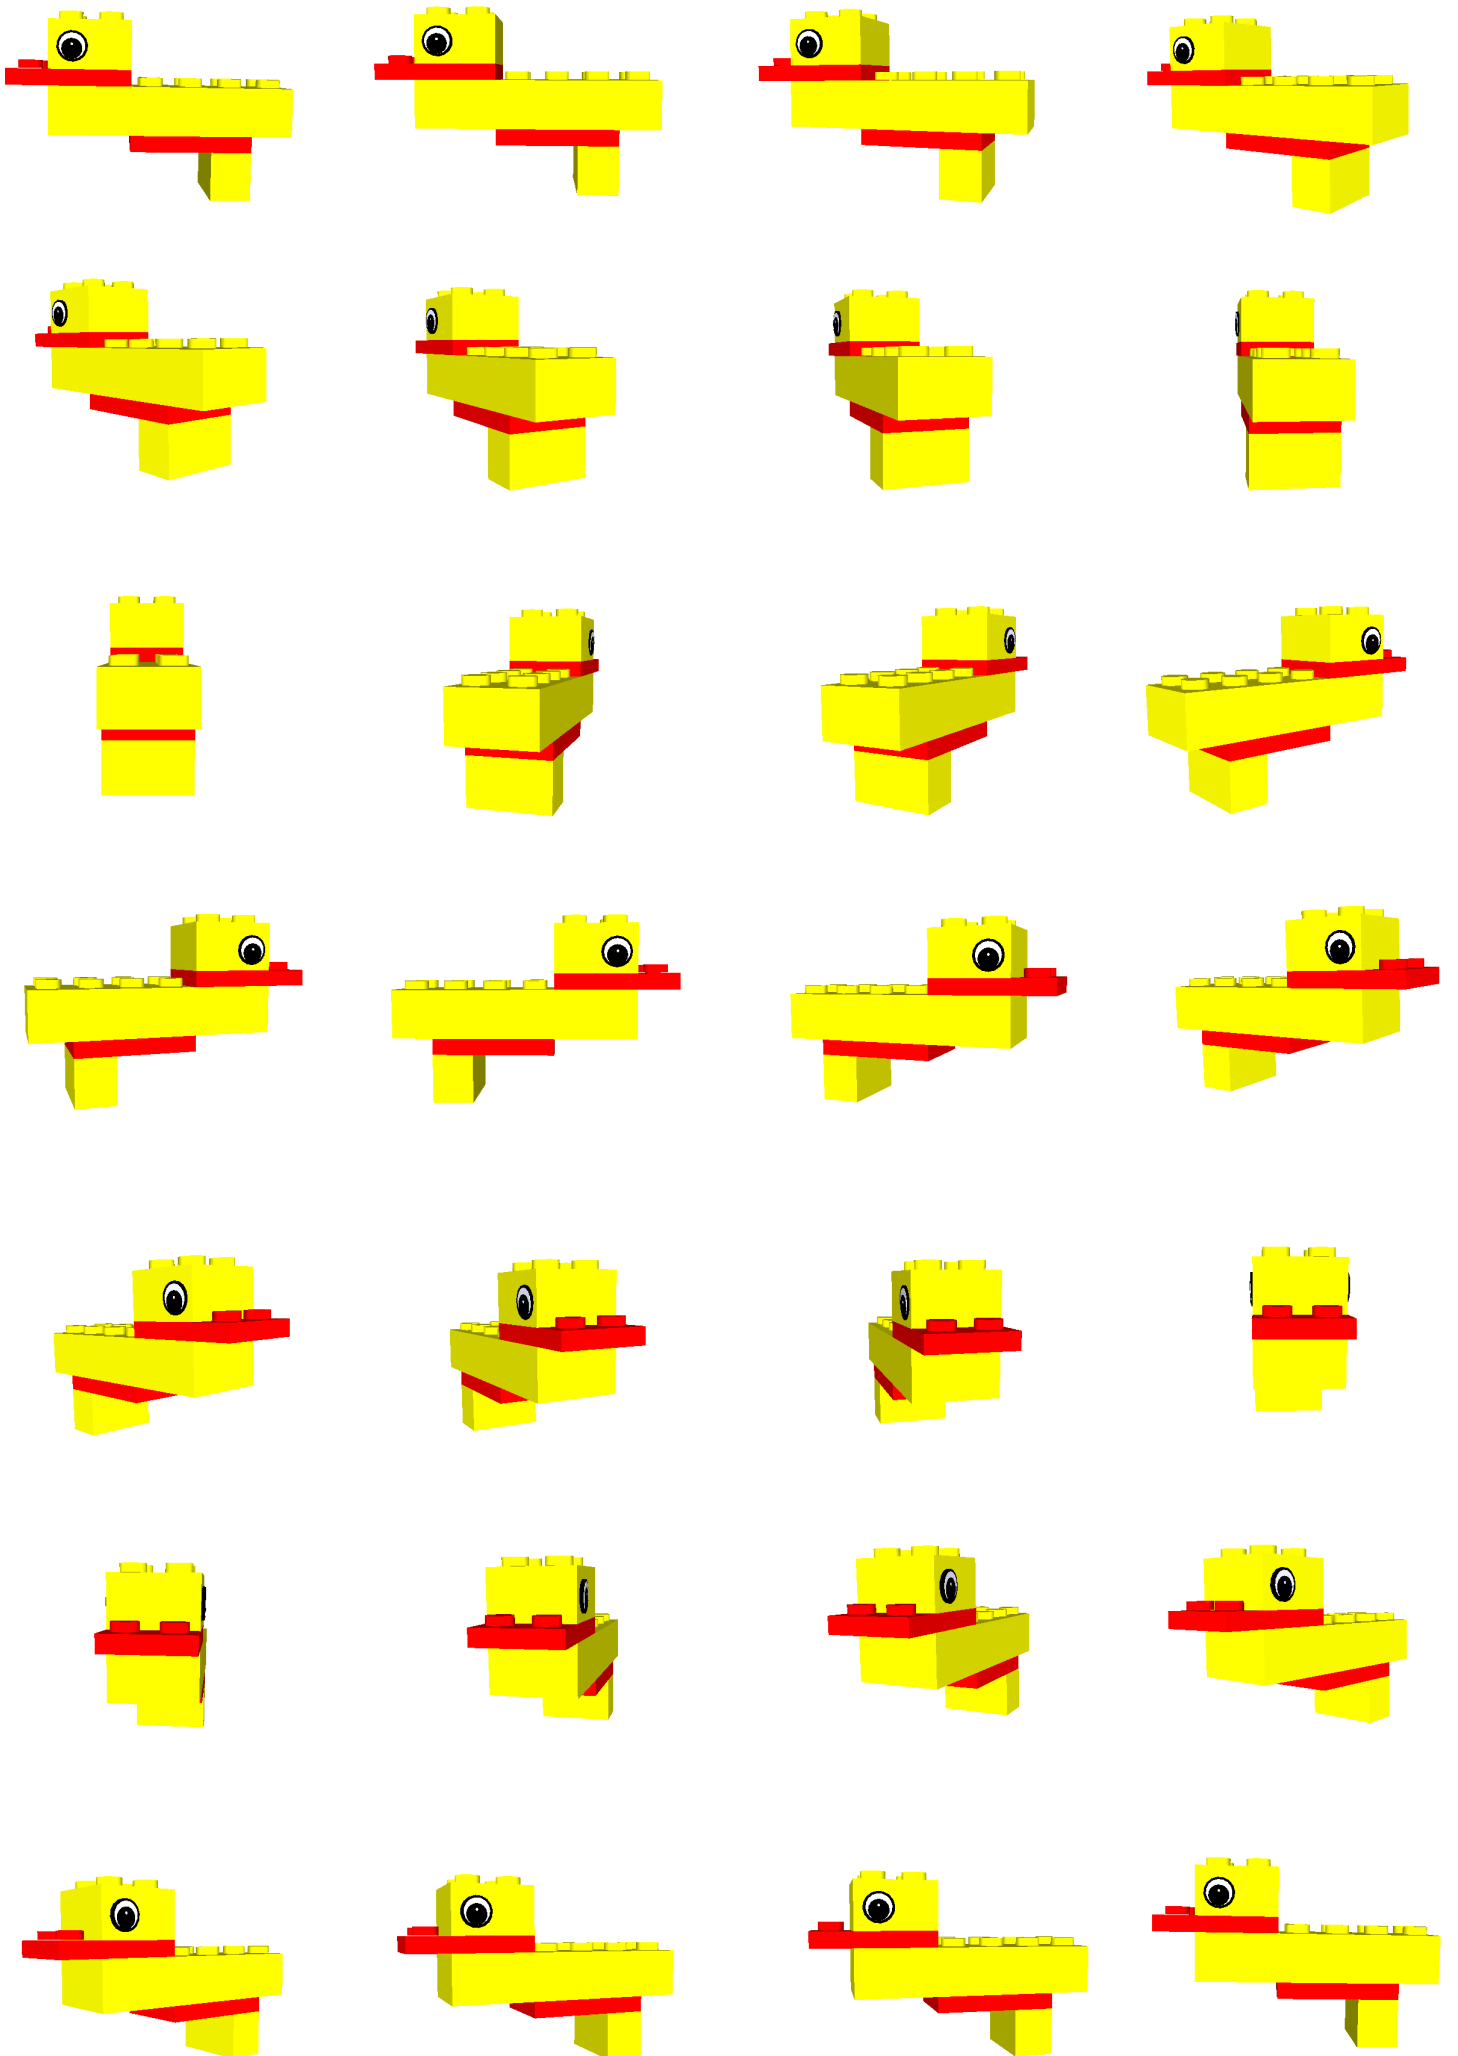

Supplement: Supplementary file 11 [file Tattersall_Reconstructing_Creative_Lego_ACCV_2020_supplemental.zip]

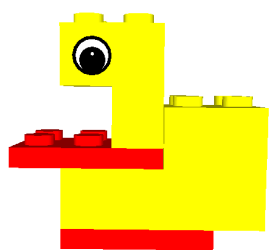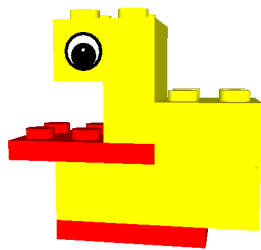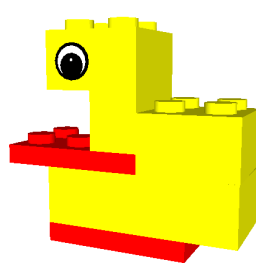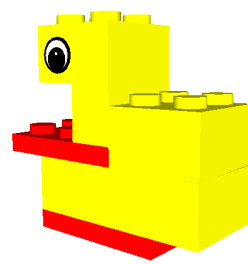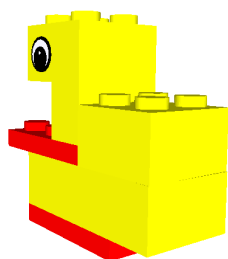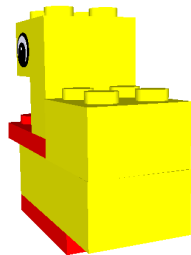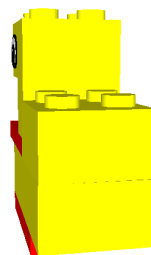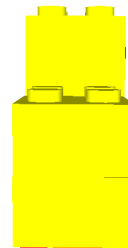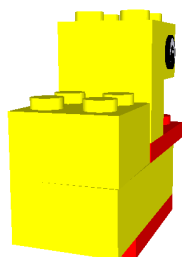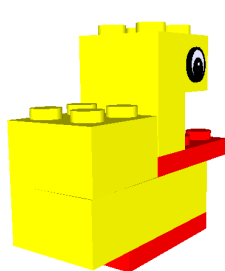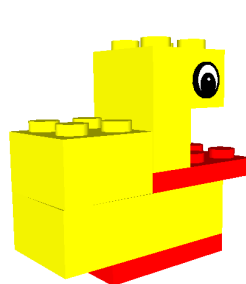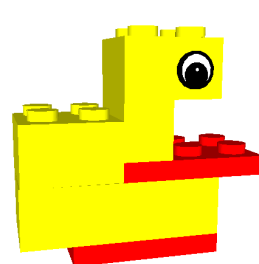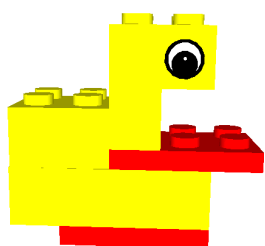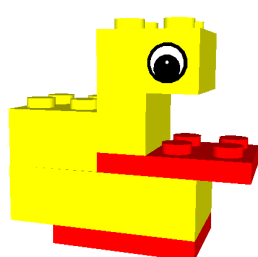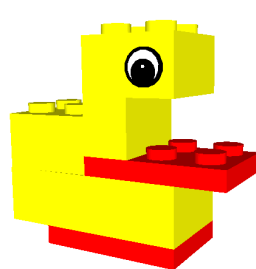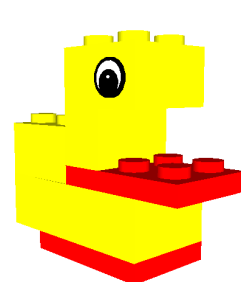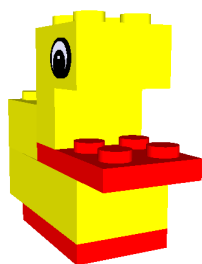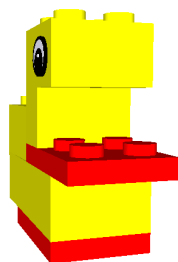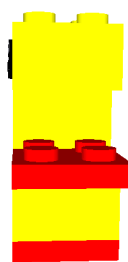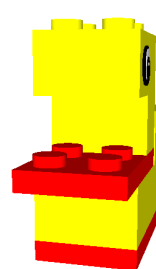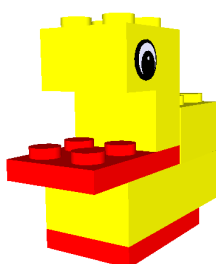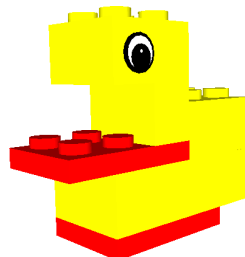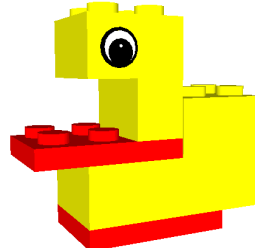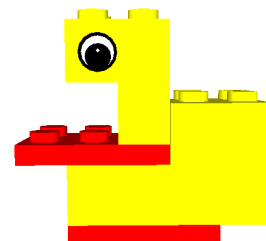

Supplement: Supplementary file 12 [file Tattersall_Reconstructing_Creative_Lego_ACCV_2020_supplemental.zip]

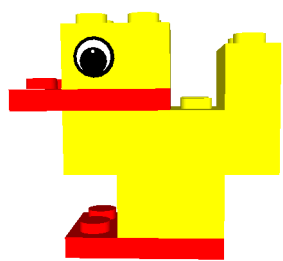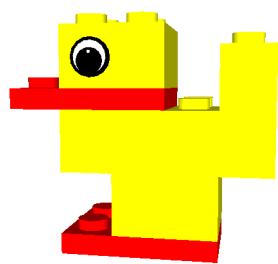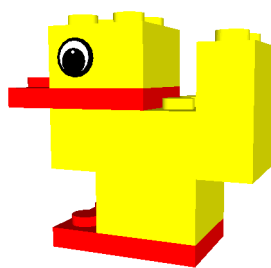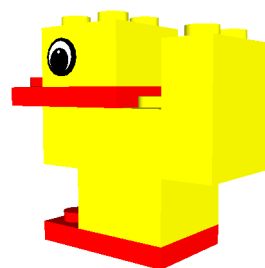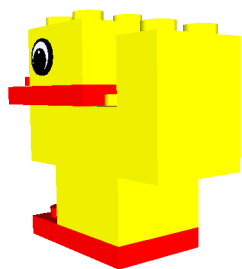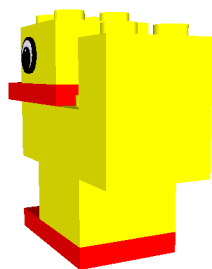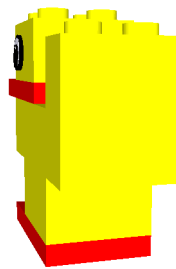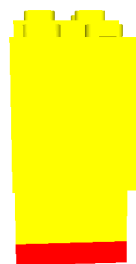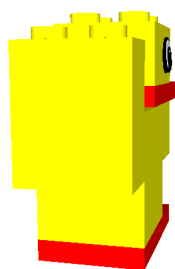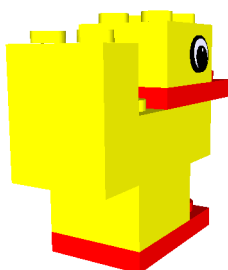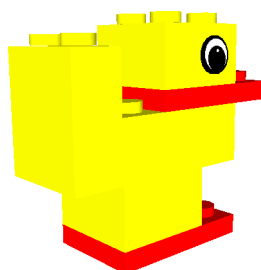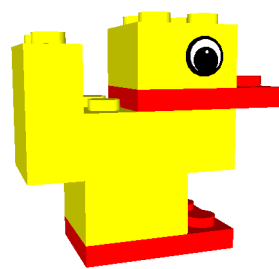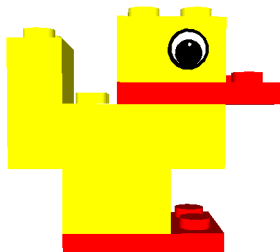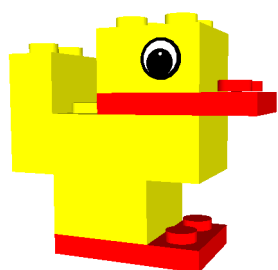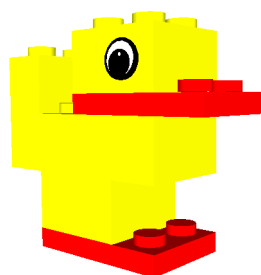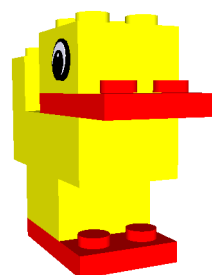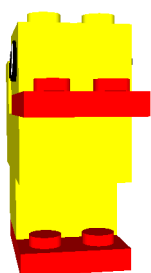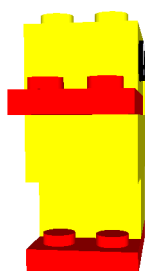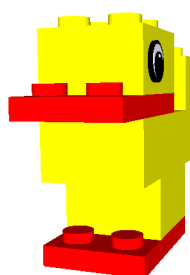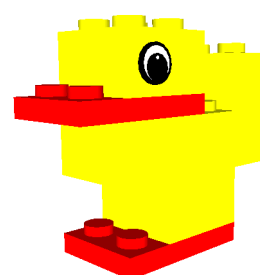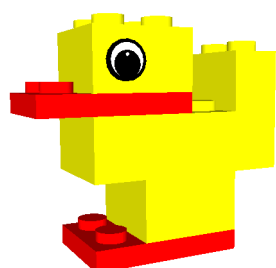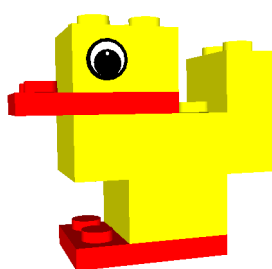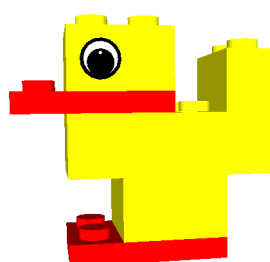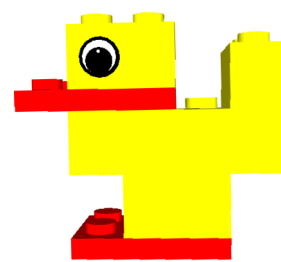

Supplement: Supplementary file 13 [file Tattersall_Reconstructing_Creative_Lego_ACCV_2020_supplemental.zip]

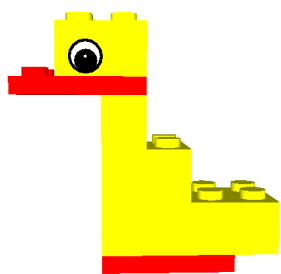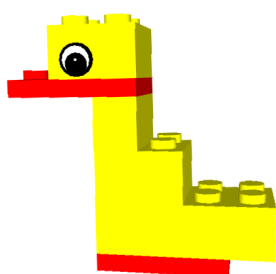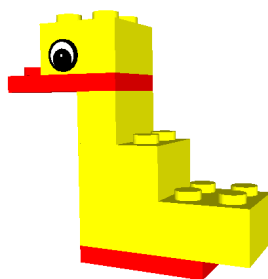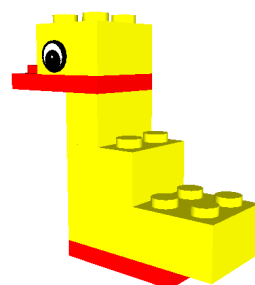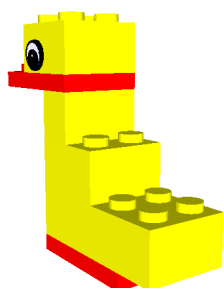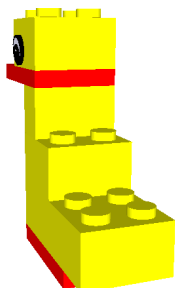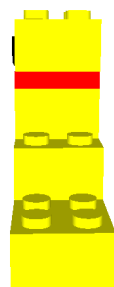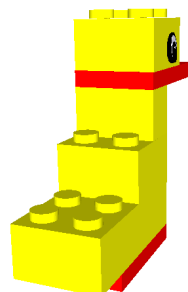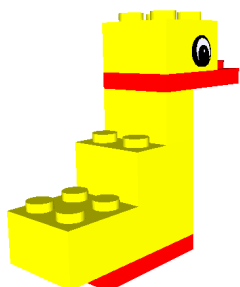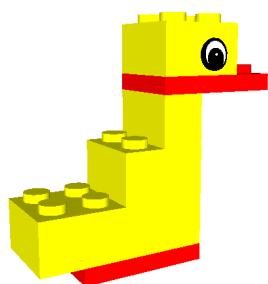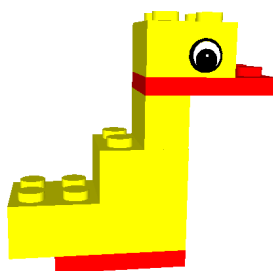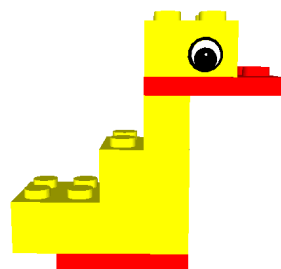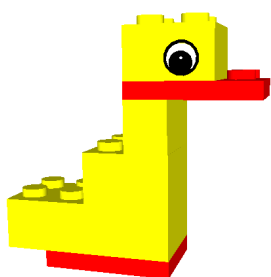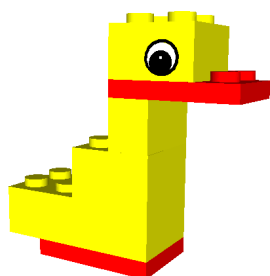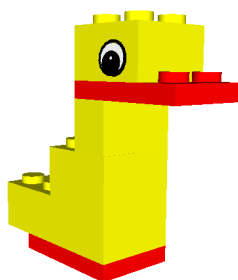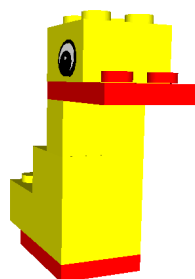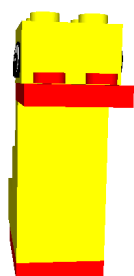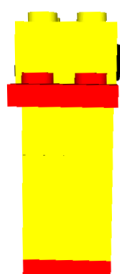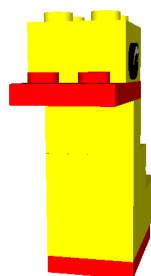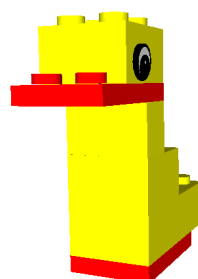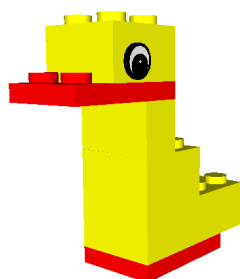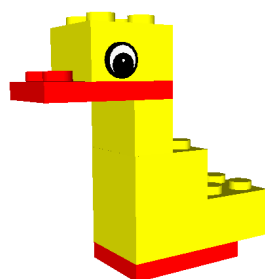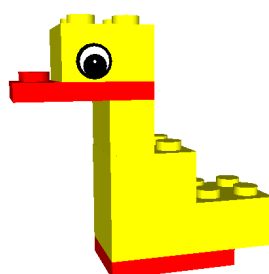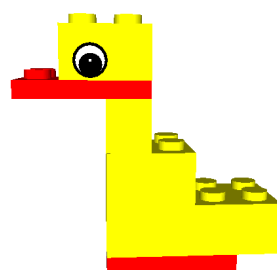

Supplement: Supplementary file 14 [file Tattersall_Reconstructing_Creative_Lego_ACCV_2020_supplemental.zip]

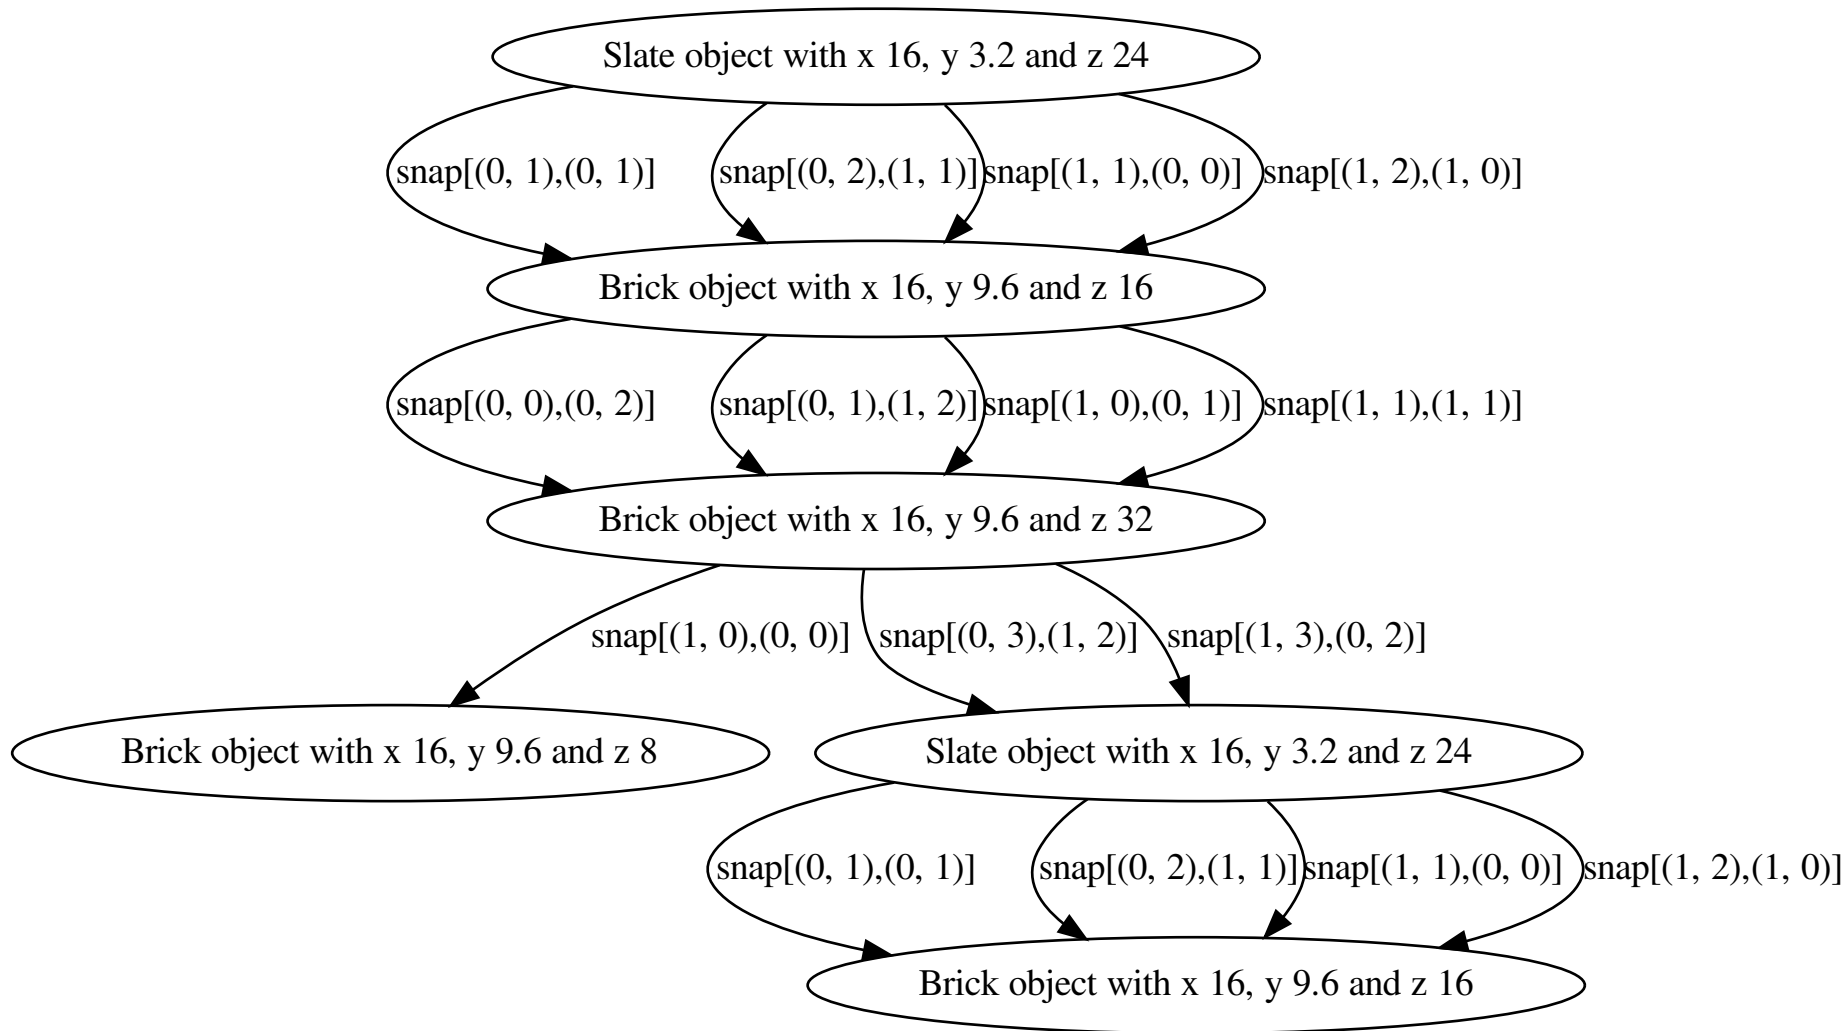

Supplement: Supplementary file 15 [file Tattersall_Reconstructing_Creative_Lego_ACCV_2020_supplemental.zip]

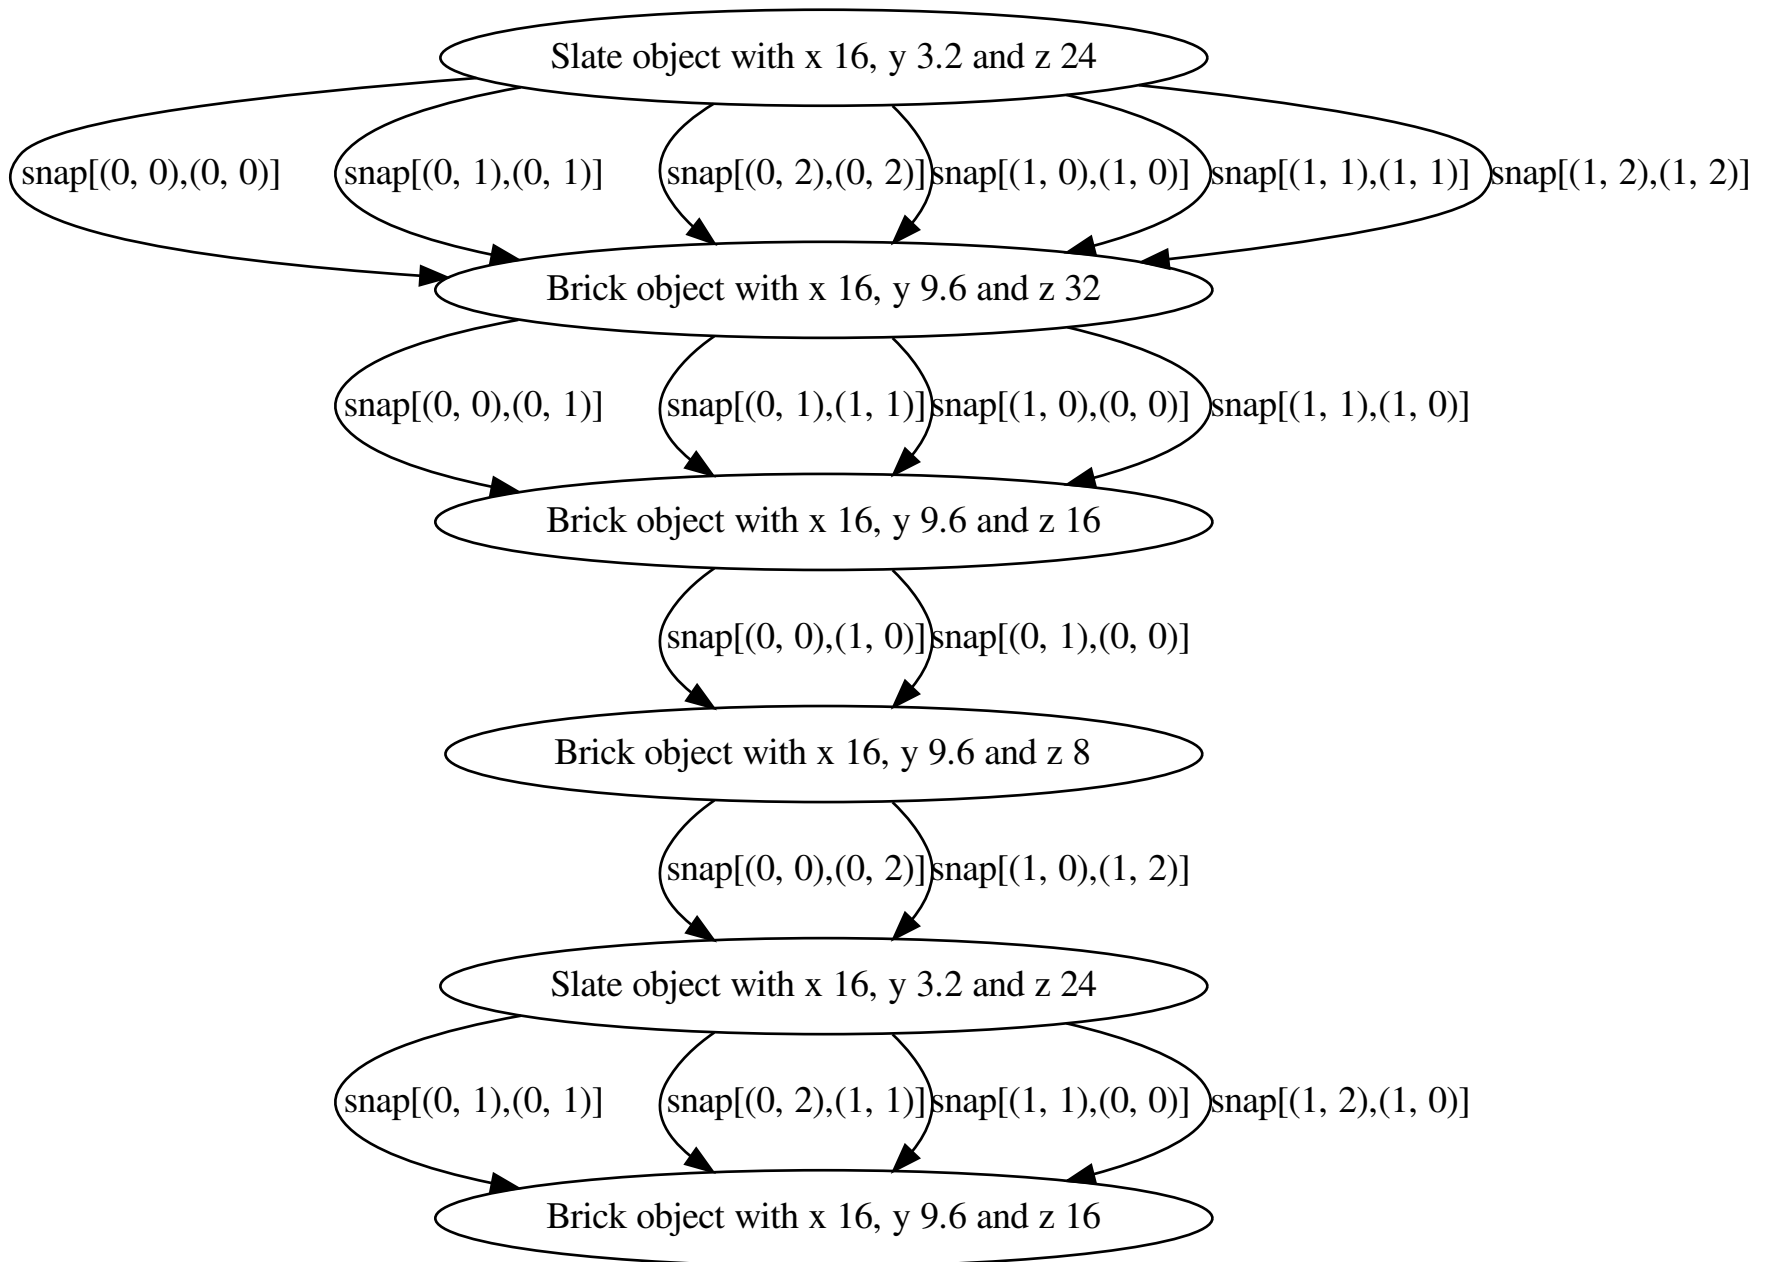

Supplement: Supplementary file 16 [file Tattersall_Reconstructing_Creative_Lego_ACCV_2020_supplemental.zip]

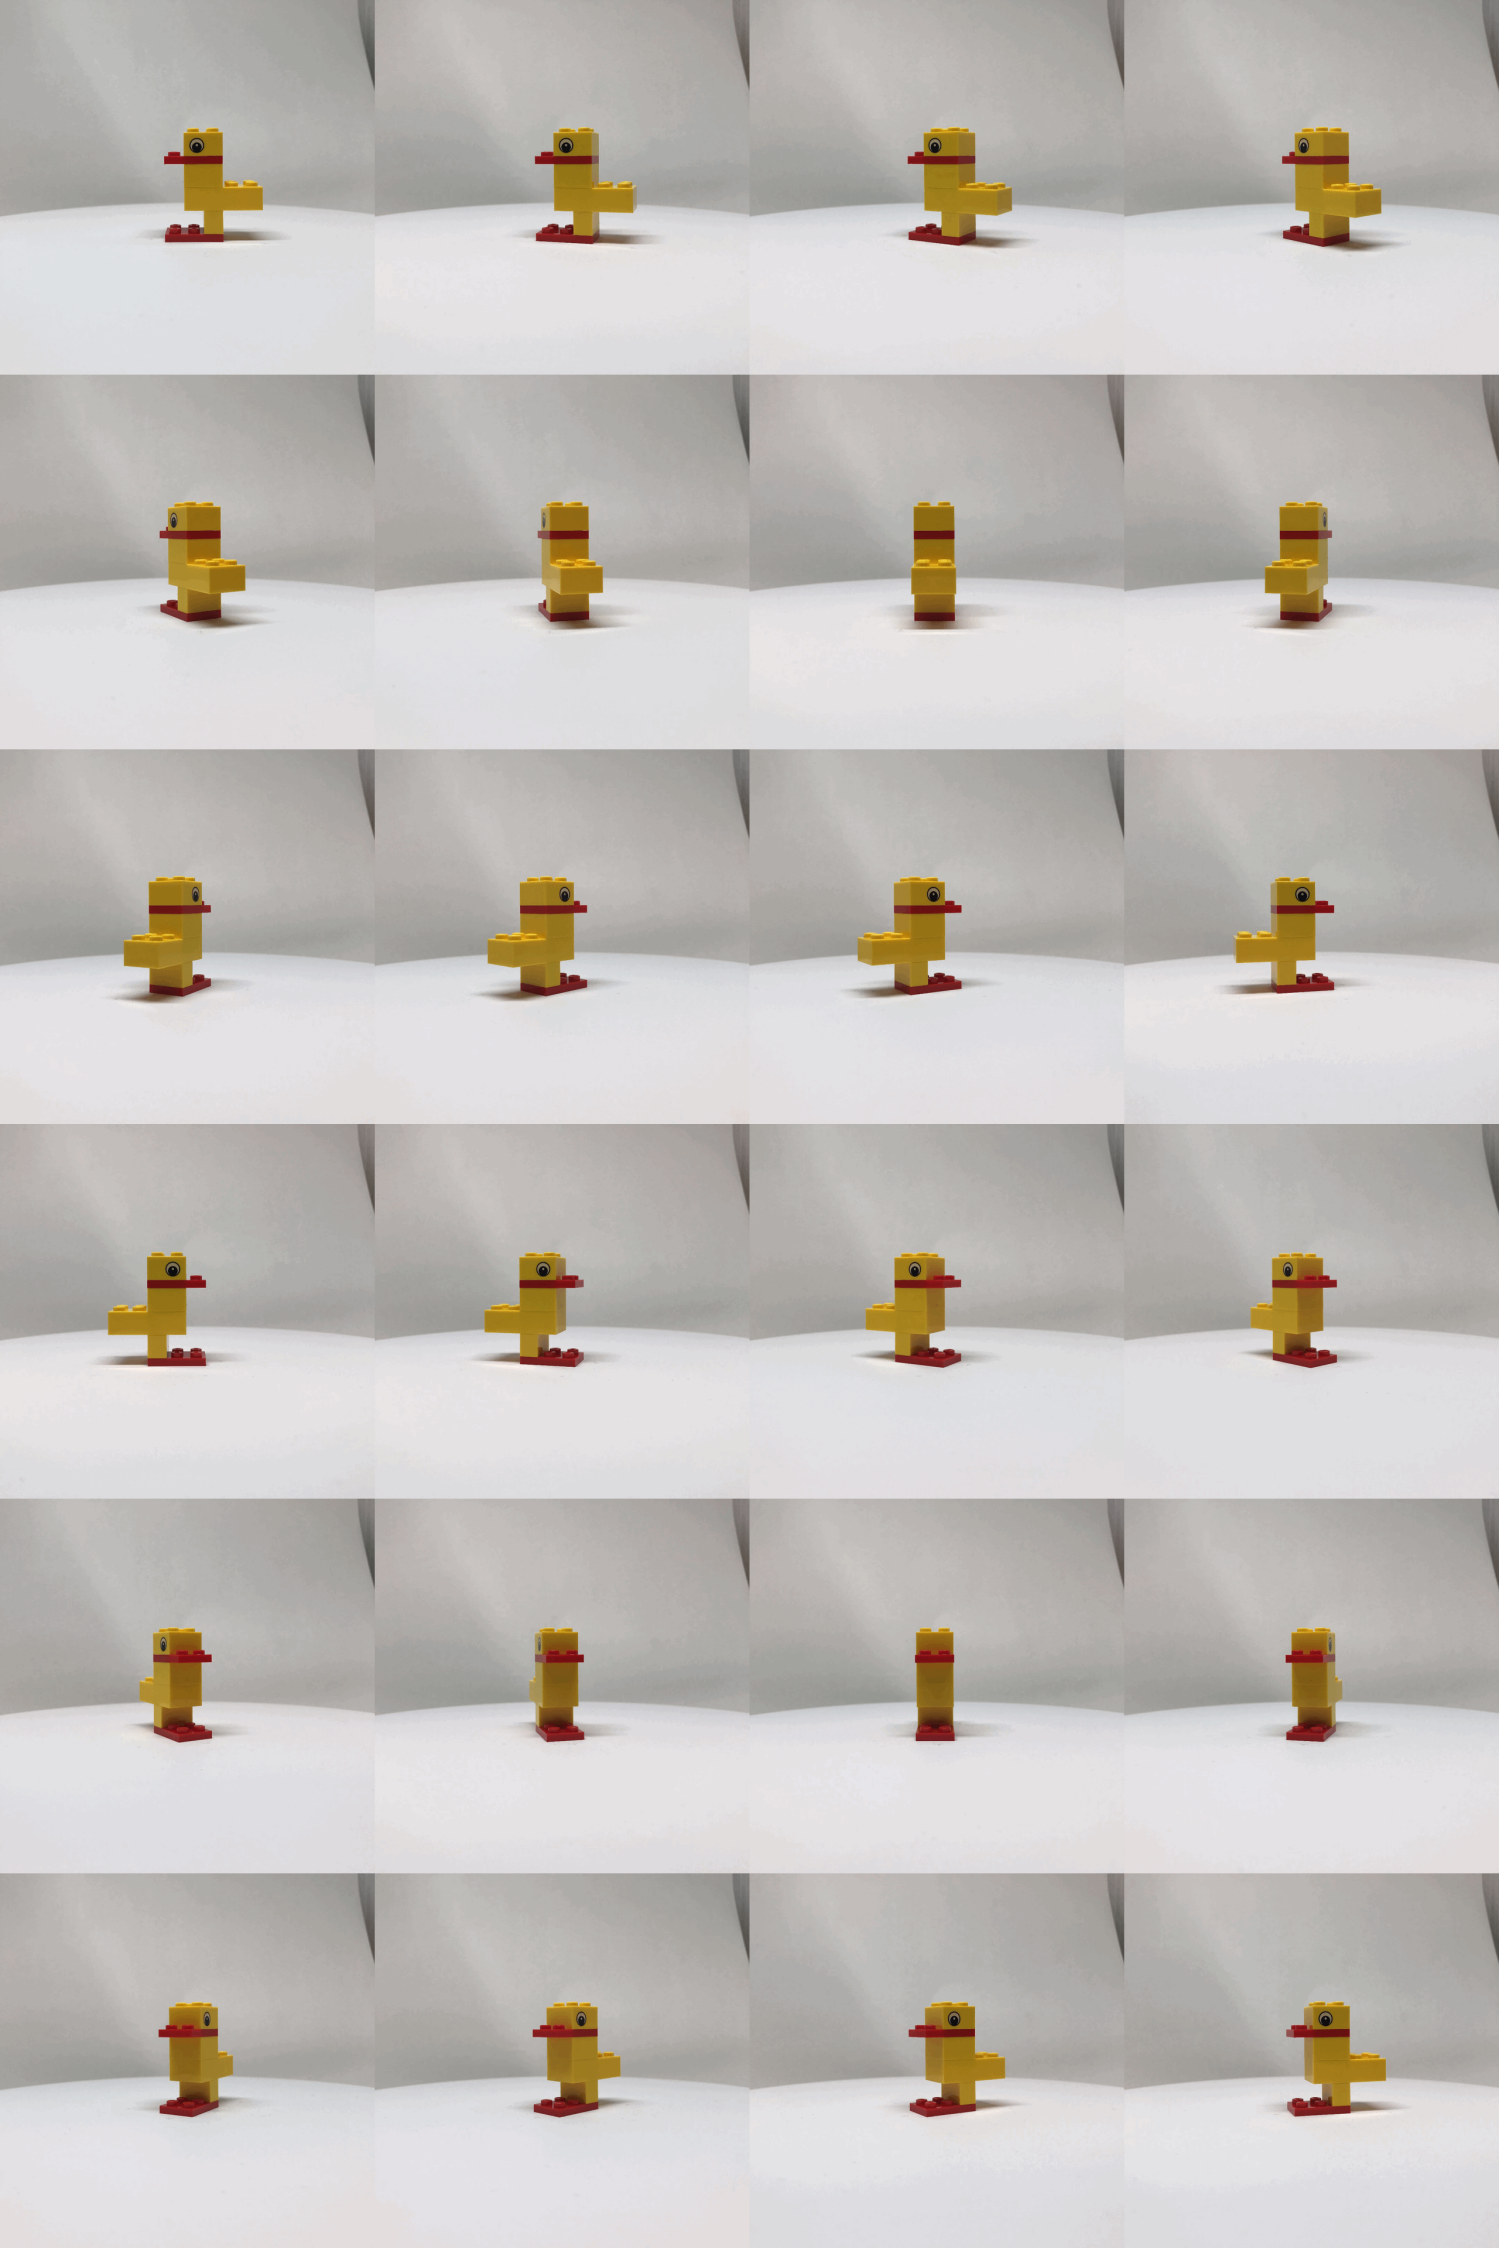

Supplement: Supplementary file 17 [file Tattersall_Reconstructing_Creative_Lego_ACCV_2020_supplemental.zip]

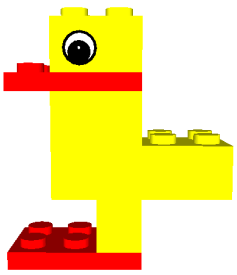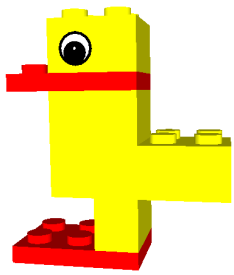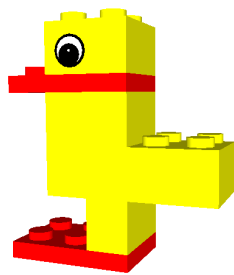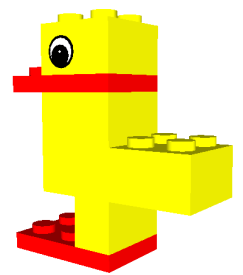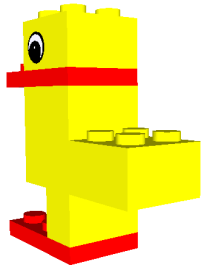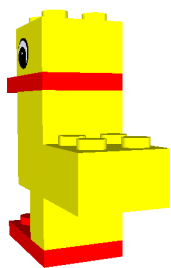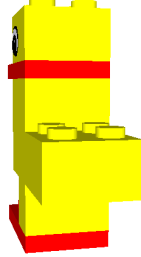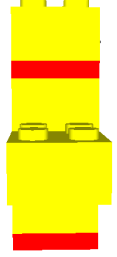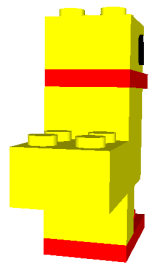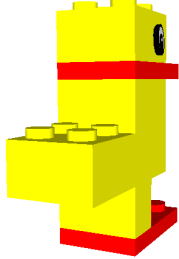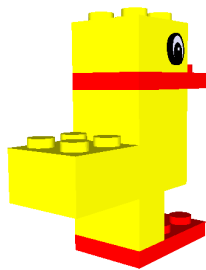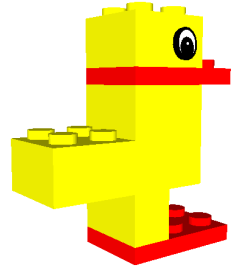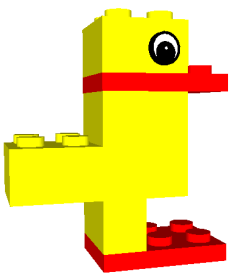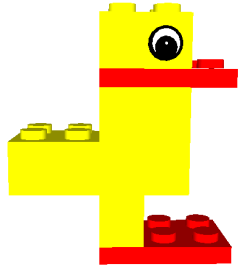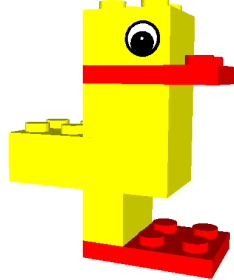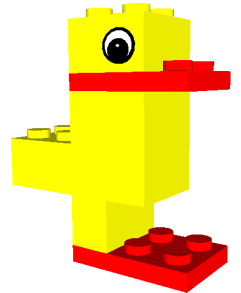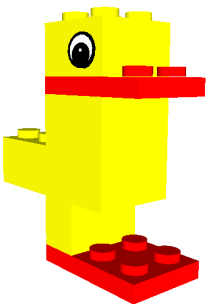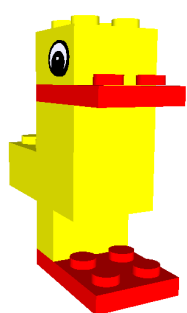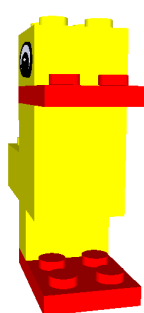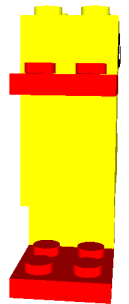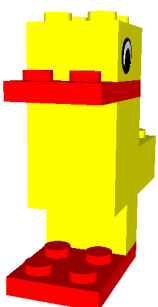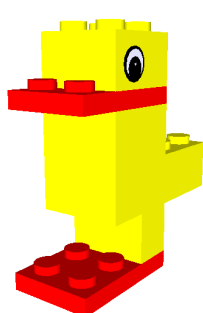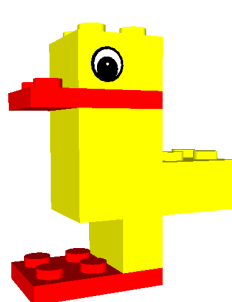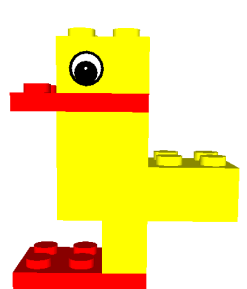

Supplement: Supplementary file 18 [file Tattersall_Reconstructing_Creative_Lego_ACCV_2020_supplemental.zip]
